# Supplementary material for: Chemical Constituents of the Root of Jasminum giraldii
Source: PubMed Central journal article supplement (PMC6270083; doi:10.3390/molecules18044766), 2013-04-22

# Supplementary Materials

## List of Content

| No. | Content                                                                                                               | page |
|-----|-----------------------------------------------------------------------------------------------------------------------|------|
| 1   | <b>Figure S1.</b> The structures of Compounds <b>1–5</b>                                                              | S3   |
| 2   | <b>Figure S2.</b> Main HMBC Correlations of Compounds <b>1</b> and <b>2</b>                                           | S3   |
| 3   | <b>Figure S3.</b> Main NOESY Correlations of Compound <b>2</b>                                                        | S3   |
| 4   | <b>Figure S4.</b> The UV Spectrum of Compound <b>1</b> in CH <sub>3</sub> OH                                          | S4   |
| 5   | <b>Figure S5.</b> The IR Spectrum of Compound <b>1</b>                                                                | S5   |
| 6   | <b>Figure S6.</b> The HR-QTF-MS Spectrum of Compound <b>1</b>                                                         | S6   |
| 7   | <b>Figure S7.</b> The <sup>1</sup> H-NMR Spectrum of Compound <b>1</b> in CD <sub>3</sub> OD                          | S7   |
| 8   | <b>Figure S8.</b> The <sup>13</sup> C-NMR Spectrum of Compound <b>1</b> in CD <sub>3</sub> OD                         | S8   |
| 9   | <b>Figure S9.</b> The DEPT Spectrum of Compound <b>1</b> in CD <sub>3</sub> OD                                        | S9   |
| 10  | <b>Figure S10.</b> The HMQC Spectrum of Compound <b>1</b> in CD <sub>3</sub> OD                                       | S10  |
| 11  | <b>Figure S11.</b> The HMBC Spectrum of Compound <b>1</b> in CD <sub>3</sub> OD                                       | S11  |
| 12  | <b>Figure S12.</b> The UV Spectrum of Compound <b>2</b> in CH <sub>3</sub> OH                                         | S12  |
| 13  | <b>Figure S13.</b> The IR Spectrum of Compound <b>2</b>                                                               | S13  |
| 14  | <b>Figure S14.</b> The HR-QTF-MS Spectrum of Compound <b>2</b>                                                        | S14  |
| 15  | <b>Figure S15.</b> The <sup>1</sup> H-NMR Spectrum of Compound <b>2</b> in CD <sub>3</sub> OD                         | S15  |
| 16  | <b>Figure S16.</b> The <sup>13</sup> C-NMR Spectrum of Compound <b>2</b> in CD <sub>3</sub> OD                        | S16  |
| 17  | <b>Figure S17.</b> The DEPT Spectrum of Compound <b>2</b> in CD <sub>3</sub> OD                                       | S17  |
| 18  | <b>Figure S18.</b> The HMQC Spectrum of Compound <b>2</b> in CD <sub>3</sub> OD                                       | S18  |
| 19  | <b>Figure S19.</b> The HMBC Spectrum of Compound <b>2</b> in CD <sub>3</sub> OD                                       | S19  |
| 20  | <b>Figure S20.</b> The NOESY Spectrum of Compound <b>2</b> in CD <sub>3</sub> OD                                      | S20  |
| 21  | <b>Figure S21.</b> The NOESY Spectrum of Compound <b>2</b> in CD <sub>3</sub> OD                                      | S21  |
| 22  | <b>Figure S22.</b> The UV Spectrum of Compound <b>3</b> in CH <sub>3</sub> OH                                         | S22  |
| 23  | <b>Figure S23.</b> The IR Spectrum of Compound <b>3</b>                                                               | S23  |
| 24  | <b>Figure S24.</b> The MS Spectrum of Compound <b>3</b>                                                               | S24  |
| 25  | <b>Figure S25.</b> The <sup>1</sup> H-NMR Spectrum of Compound <b>3</b> in Me <sub>2</sub> CO- <i>d</i> <sub>6</sub>  | S25  |
| 26  | <b>Figure S26.</b> The <sup>13</sup> C-NMR Spectrum of Compound <b>3</b> in Me <sub>2</sub> CO- <i>d</i> <sub>6</sub> | S26  |
| 27  | <b>Figure S27.</b> The UV Spectrum of Compound <b>4</b> in CH <sub>3</sub> OH                                         | S27  |
| 28  | <b>Figure S28.</b> The IR Spectrum of Compound <b>4</b>                                                               | S28  |
| 29  | <b>Figure S29.</b> The MS Spectrum of Compound <b>4</b>                                                               | S29  |
| 30  | <b>Figure S30.</b> The <sup>1</sup> H-NMR Spectrum of Compound <b>4</b> in CD <sub>3</sub> OD                         | S30  |
| 31  | <b>Figure S31.</b> The <sup>13</sup> C-NMR Spectrum of Compound <b>4</b> in CD <sub>3</sub> OD                        | S31  |
| 32  | <b>Figure S32.</b> The DEPT Spectrum of Compound <b>4</b> in CD <sub>3</sub> OD                                       | S32  |
| 33  | <b>Figure S33.</b> The UV Spectrum of Compound <b>5</b> in CH <sub>3</sub> OH                                         | S33  |
| 34  | <b>Figure S34.</b> The IR Spectrum of Compound <b>5</b>                                                               | S34  |
| 35  | <b>Figure S35.</b> The ESIMS Spectrum of Compound <b>5</b>                                                            | S35  |
| 36  | <b>Figure S36.</b> The <sup>1</sup> H-NMR Spectrum of Compound <b>5</b> in Me <sub>2</sub> CO- <i>d</i> <sub>6</sub>  | S36  |
| 37  | <b>Figure S37.</b> The <sup>13</sup> C-NMR Spectrum of Compound <b>5</b> in Me <sub>2</sub> CO- <i>d</i> <sub>6</sub> | S37  |
| 38  | <b>Figure S38.</b> The DEPT Spectrum of Compound <b>5</b> in Me <sub>2</sub> CO- <i>d</i> <sub>6</sub>                | S38  |

**Figure S1.** The structures of compounds 1–5.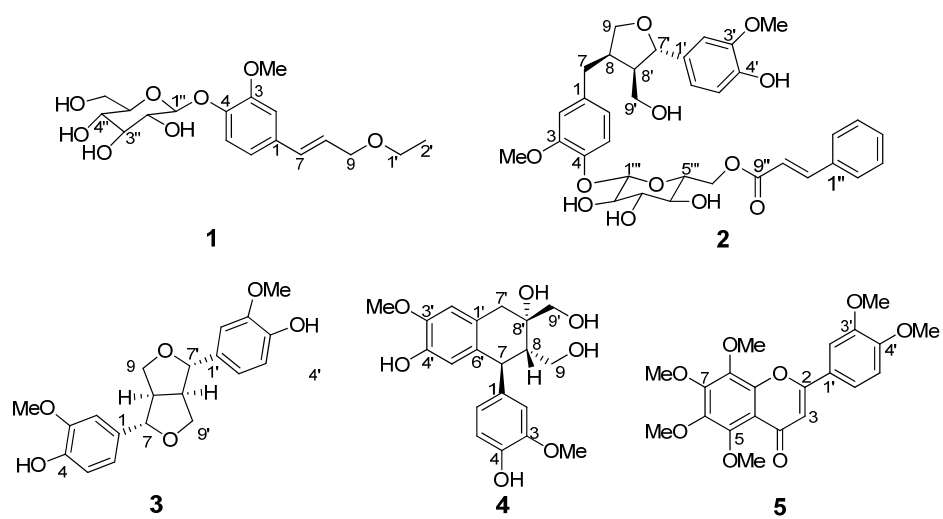**Figure S2.** Main HMBC Correlations of Compounds 1 and 2.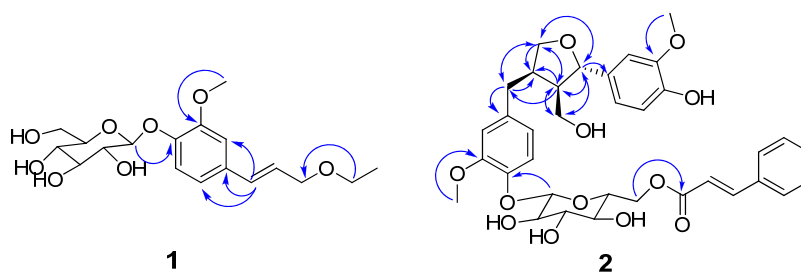**Figure S3.** Main NOESY Correlations of Compound 2.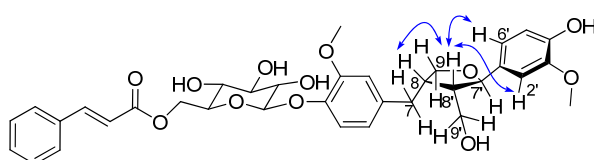

**Figure S4.** The UV Spectrum of Compound 1 in CH<sub>3</sub>OH.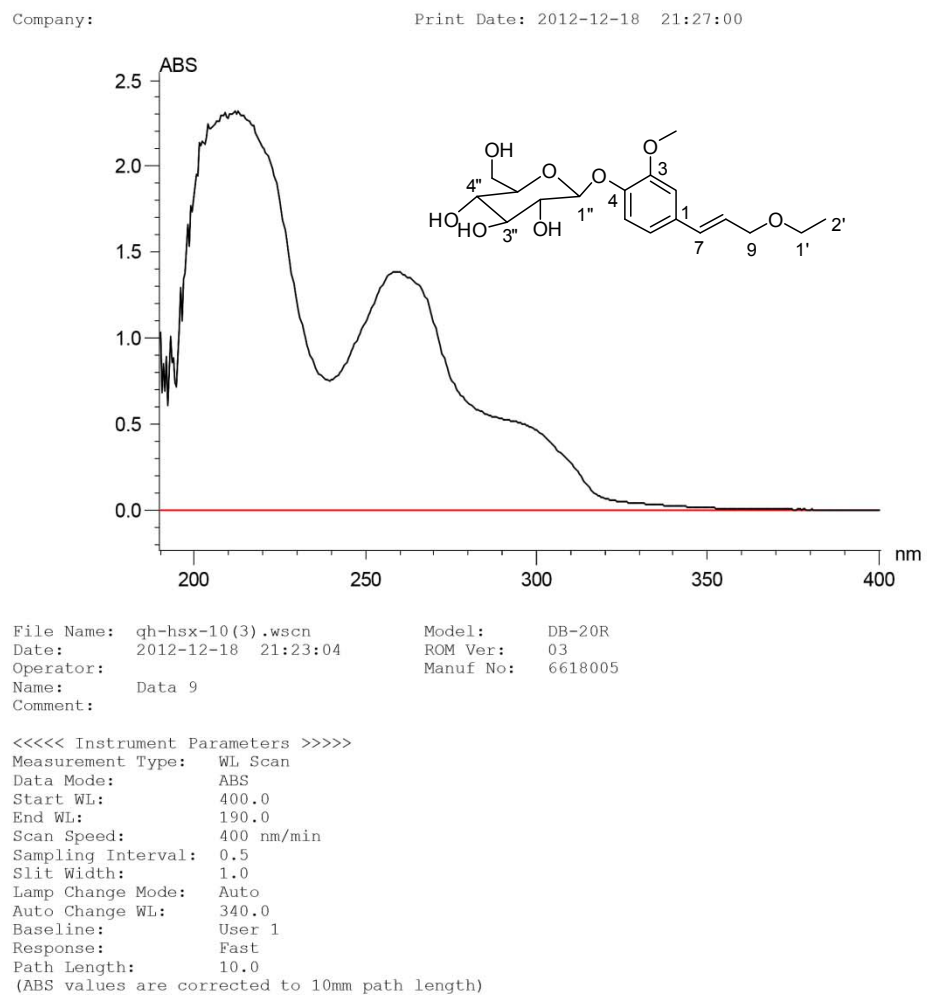

Figure S5. The IR Spectrum of Compound 1.

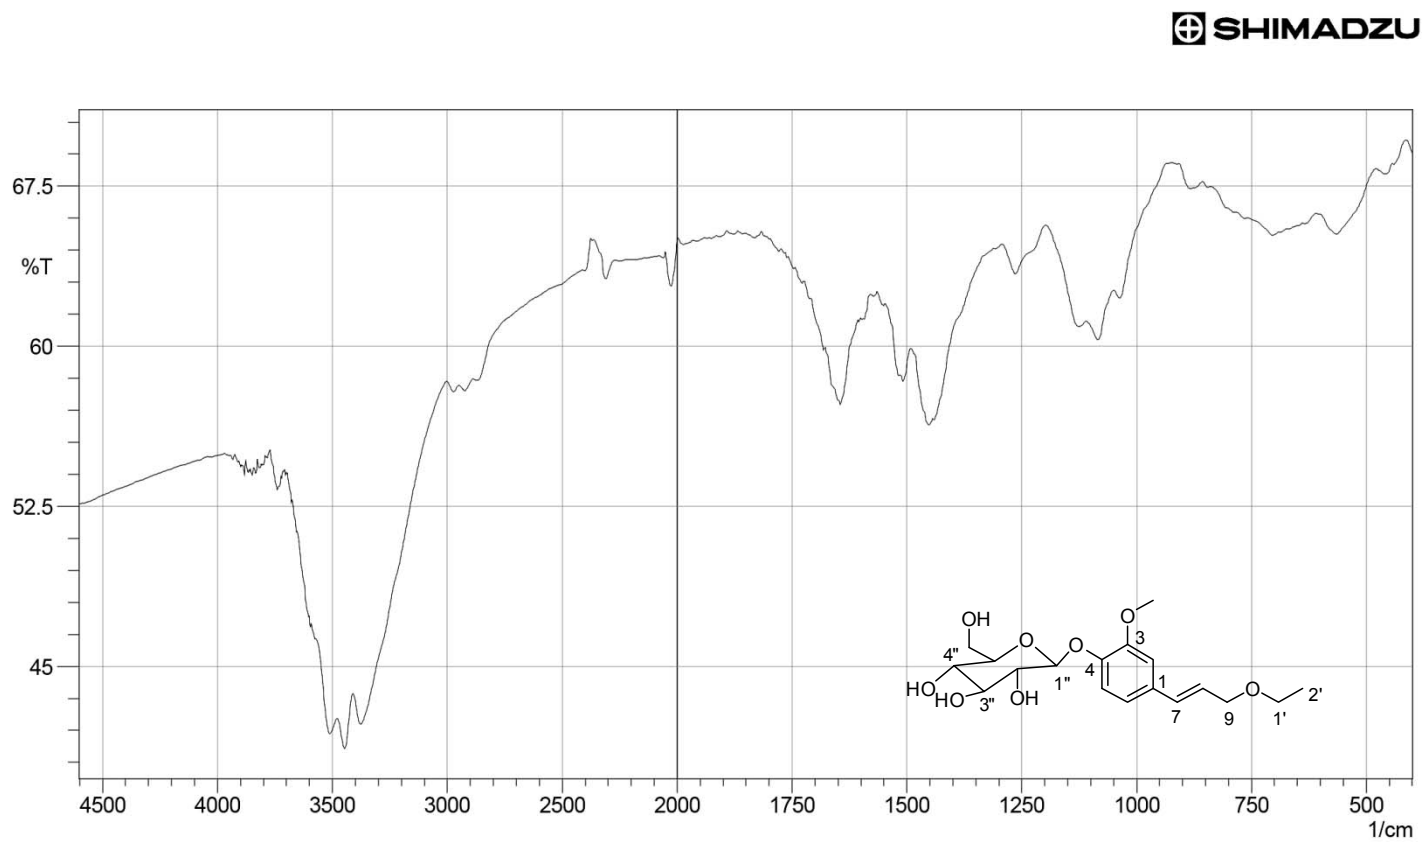

Figure S6. The HR-QTF-MS Spectrum of Compound 1.

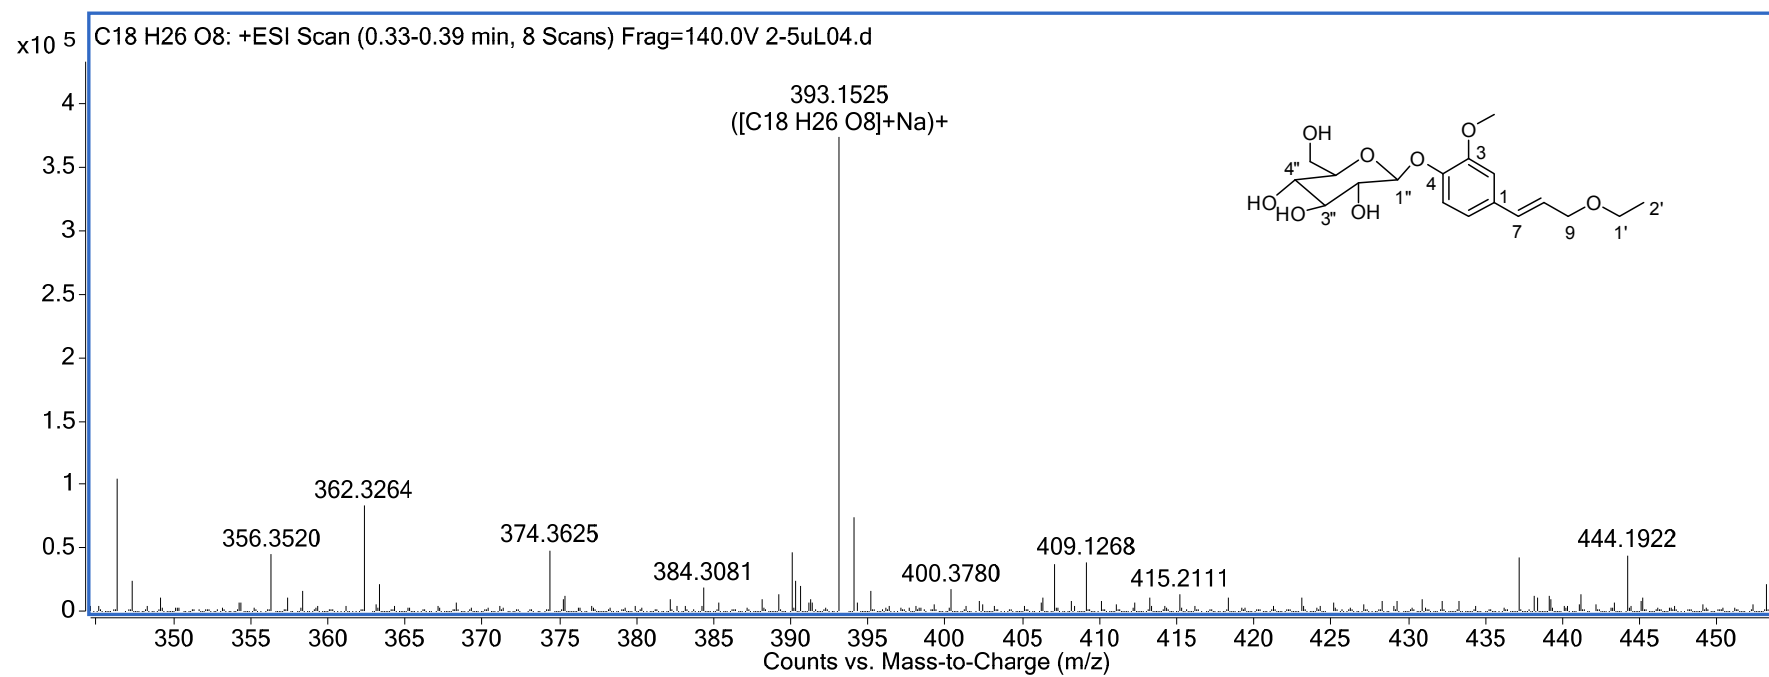

Figure S7. The  $^1\text{H}$ -NMR Spectrum of Compound 1 in  $\text{CD}_3\text{OD}$ .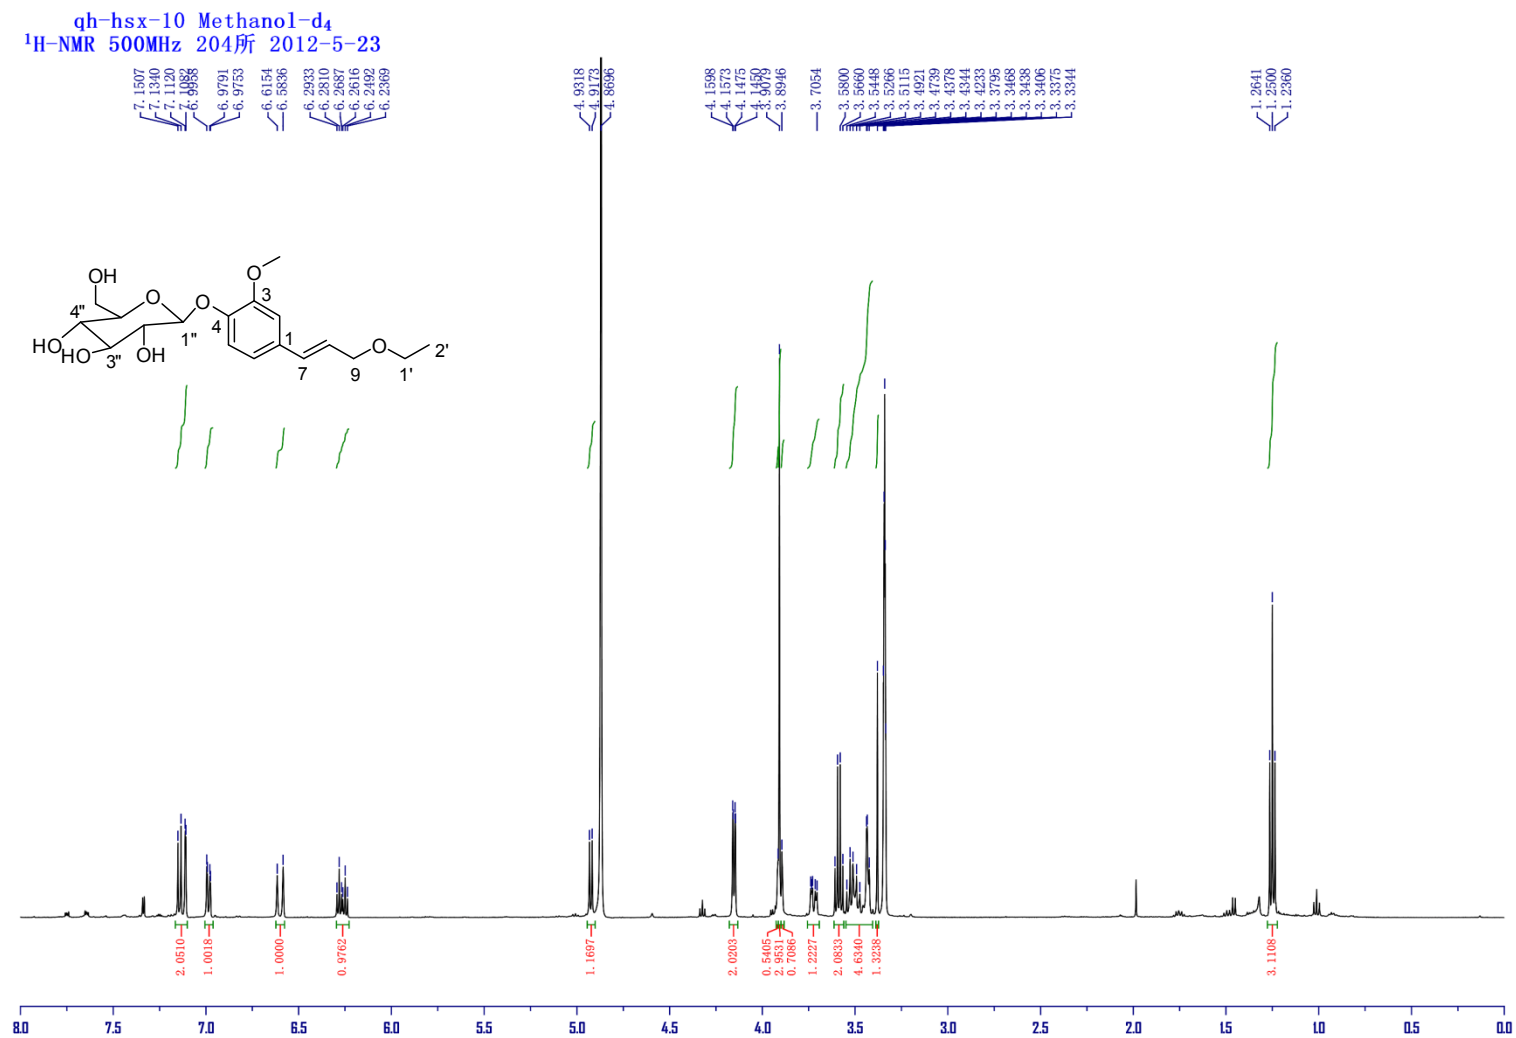

**Figure S8.** The  $^{13}\text{C}$ -NMR Spectrum of Compound 1 in  $\text{CD}_3\text{OD}$ .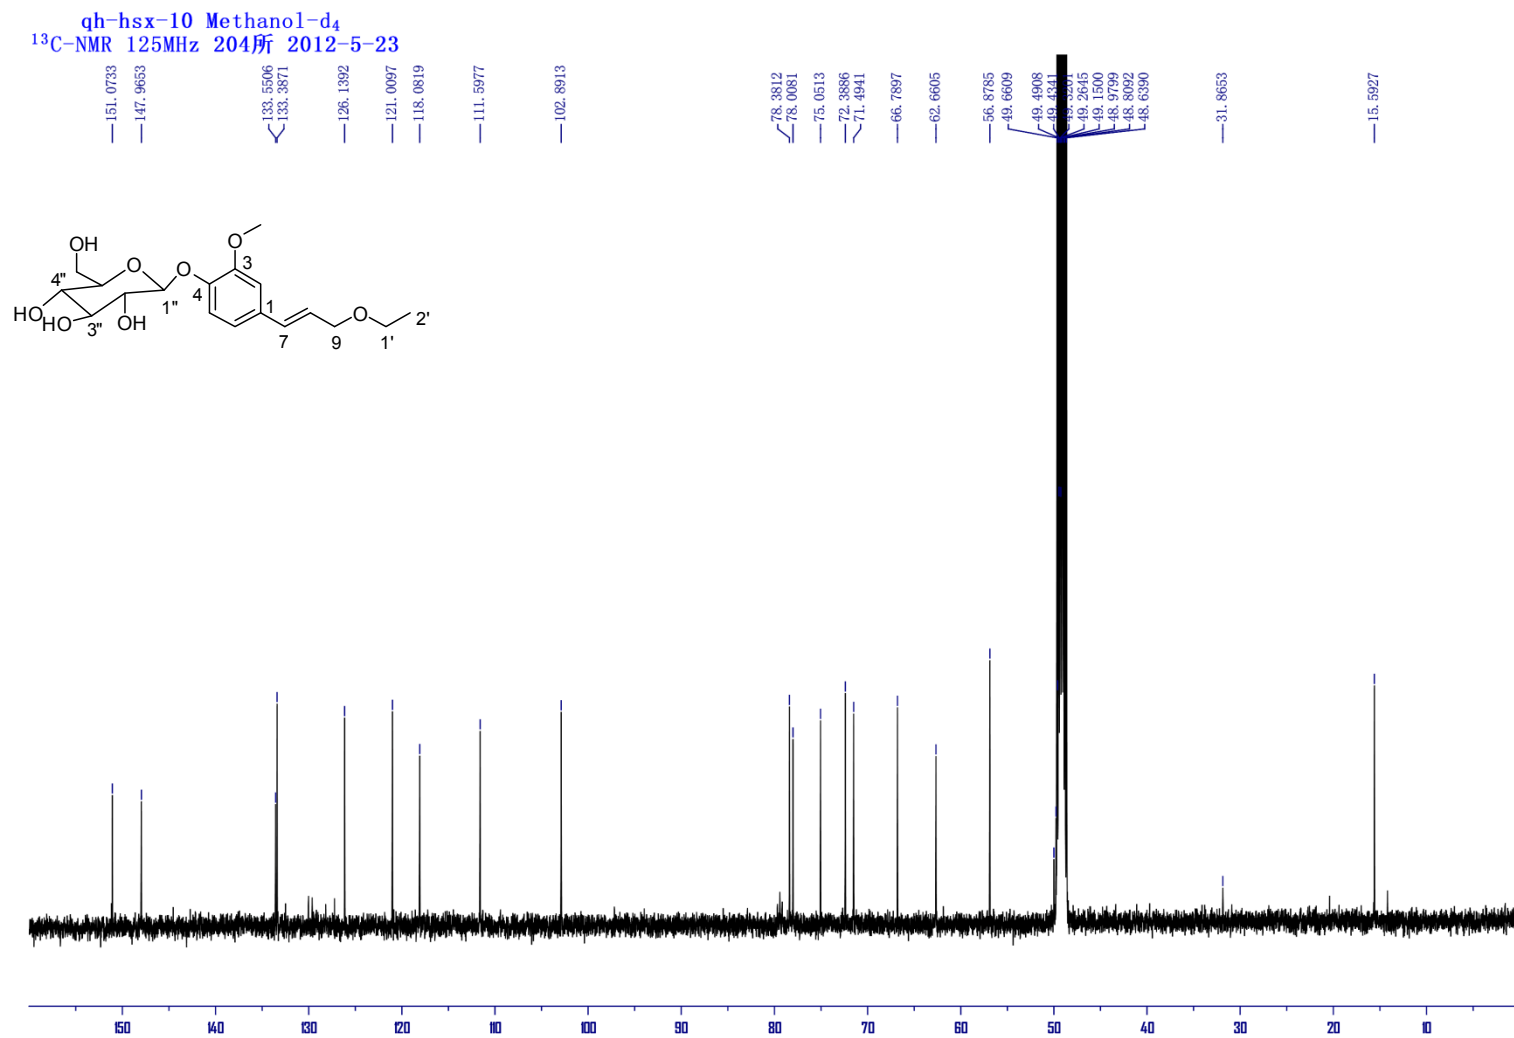

Figure S9. The DEPT Spectrum of Compound 1 in CD<sub>3</sub>OD.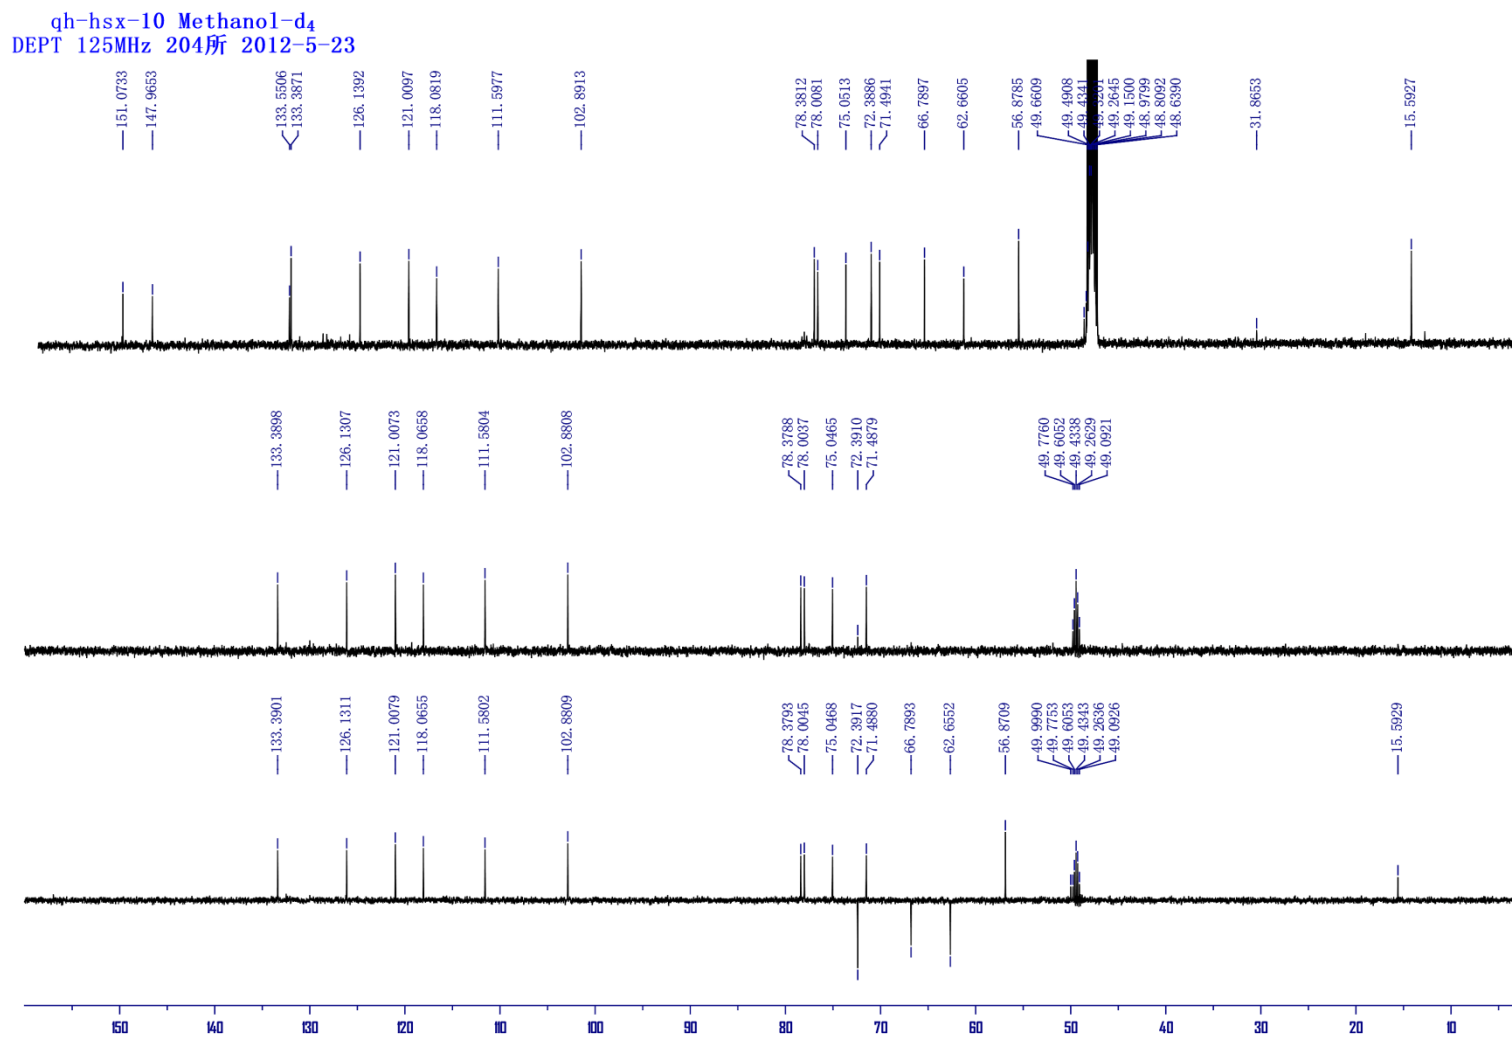



Figure S10. The HMQC Spectrum of Compound 1 in CD<sub>3</sub>OD.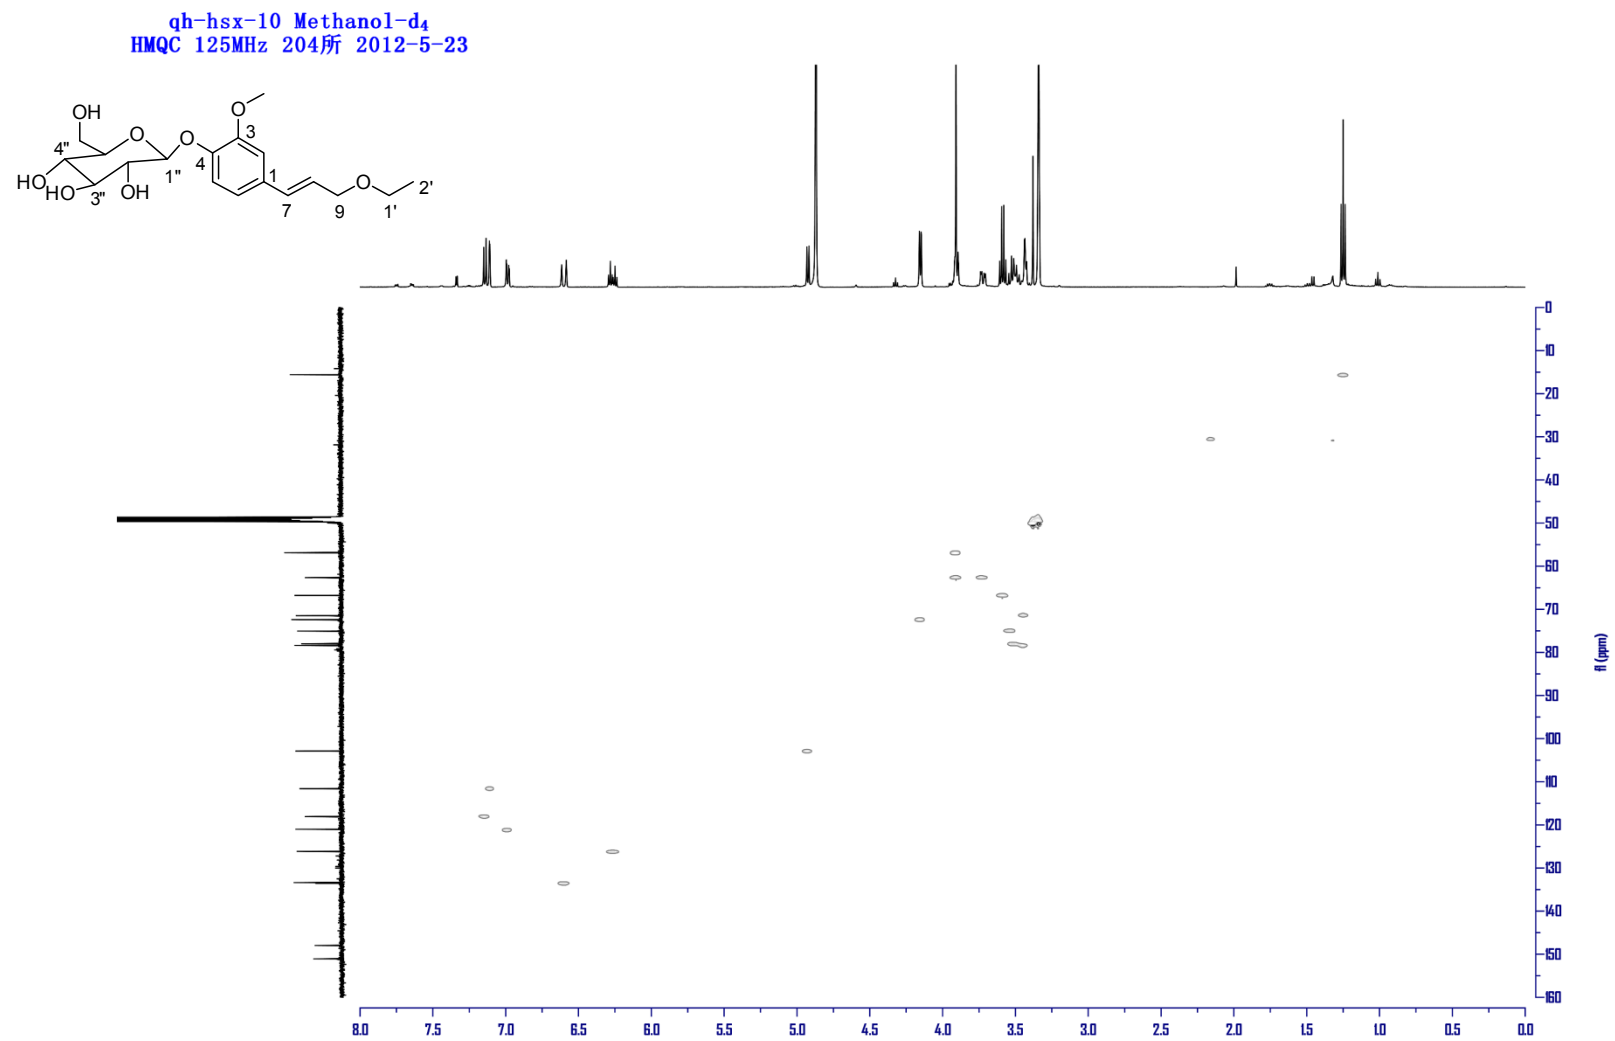

Figure S11. The HMBC Spectrum of Compound 1 in CD<sub>3</sub>OD.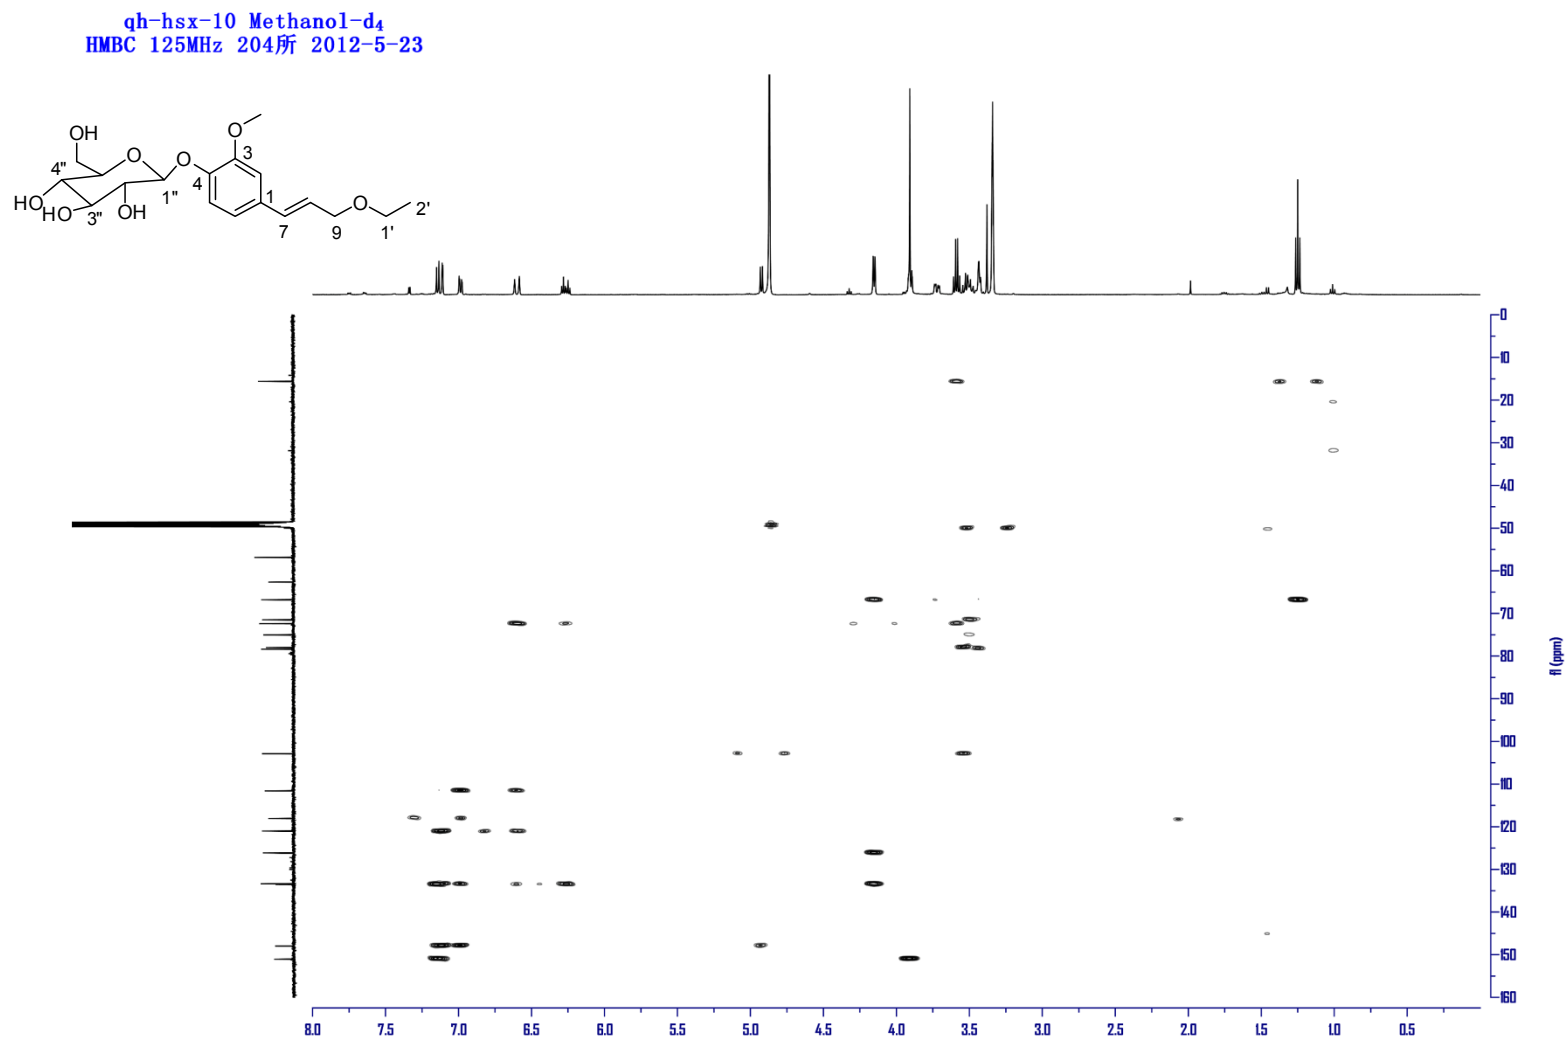

**Figure S12.** The UV Spectrum of Compound 2 in CH<sub>3</sub>OH.

Company:

Print Date: 2012-12-18 23:00:09

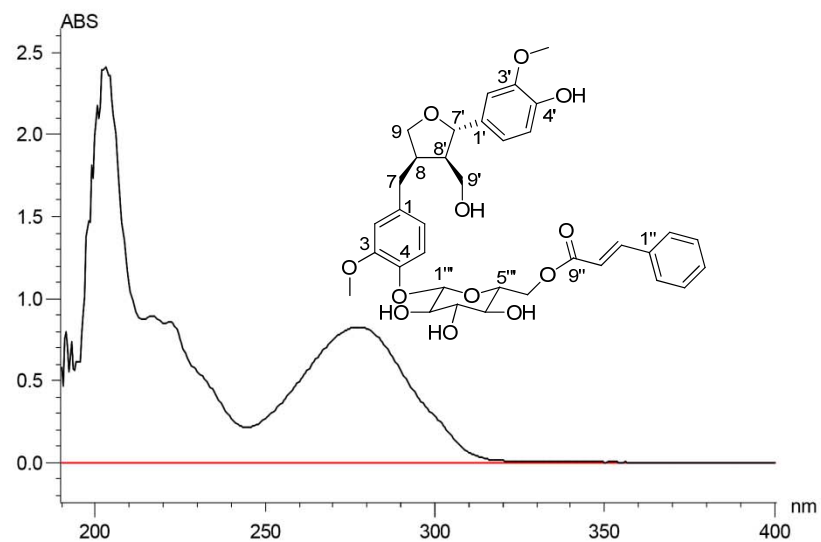

File Name: qh-hsx-66.wscn      Model: DB-20R  
Date: 2012-12-18 22:59:26      ROM Ver: 03  
Operator:      Manuf No: 6618005  
Name: Data 41  
Comment:

<<<< Instrument Parameters >>>>  
Measurement Type: WL Scan  
Data Mode: ABS  
Start WL: 400.0  
End WL: 190.0  
Scan Speed: 400 nm/min  
Sampling Interval: 0.5  
Slit Width: 1.0  
Lamp Change Mode: Auto  
Auto Change WL: 340.0  
Baseline: User 1  
Response: Fast  
Path Length: 10.0  
(ABS values are corrected to 10mm path length)

Figure S13. The IR Spectrum of Compound 2.

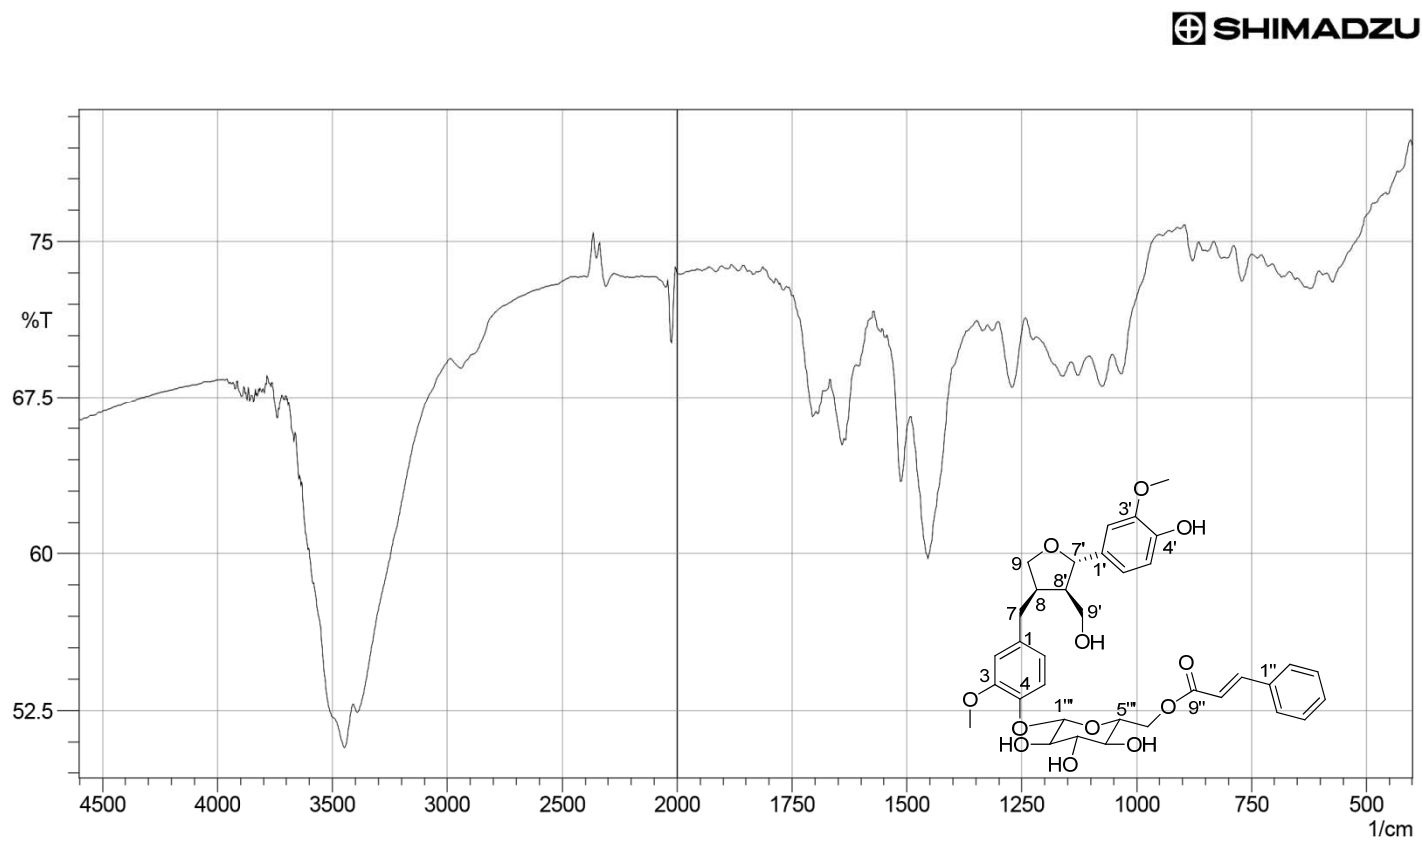

Figure S14. The HR-QTF-MS Spectrum of Compound 2.

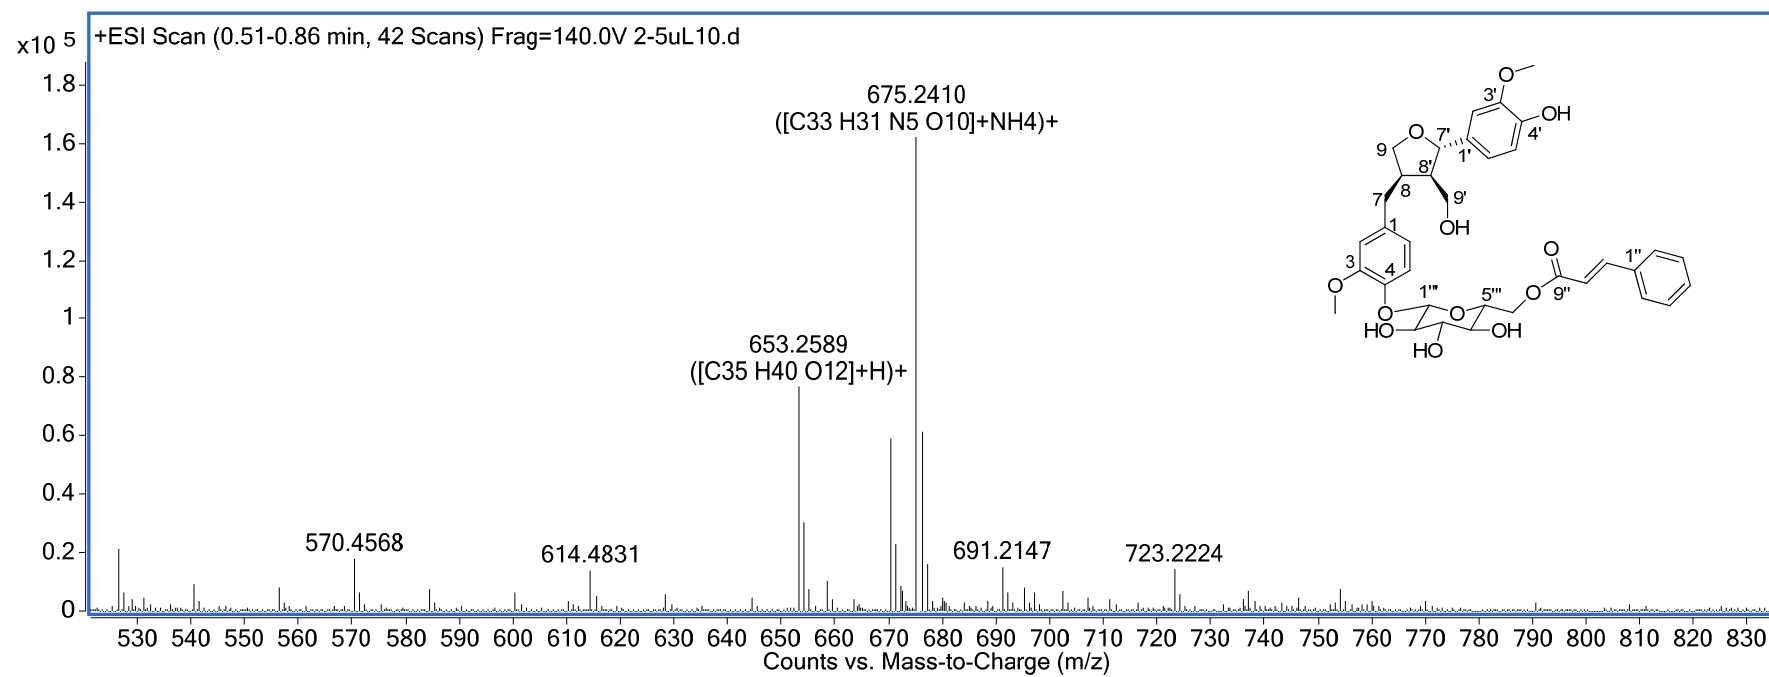

Figure S15. The  $^1\text{H-NMR}$  Spectrum of Compound 2 in  $\text{CD}_3\text{OD}$ .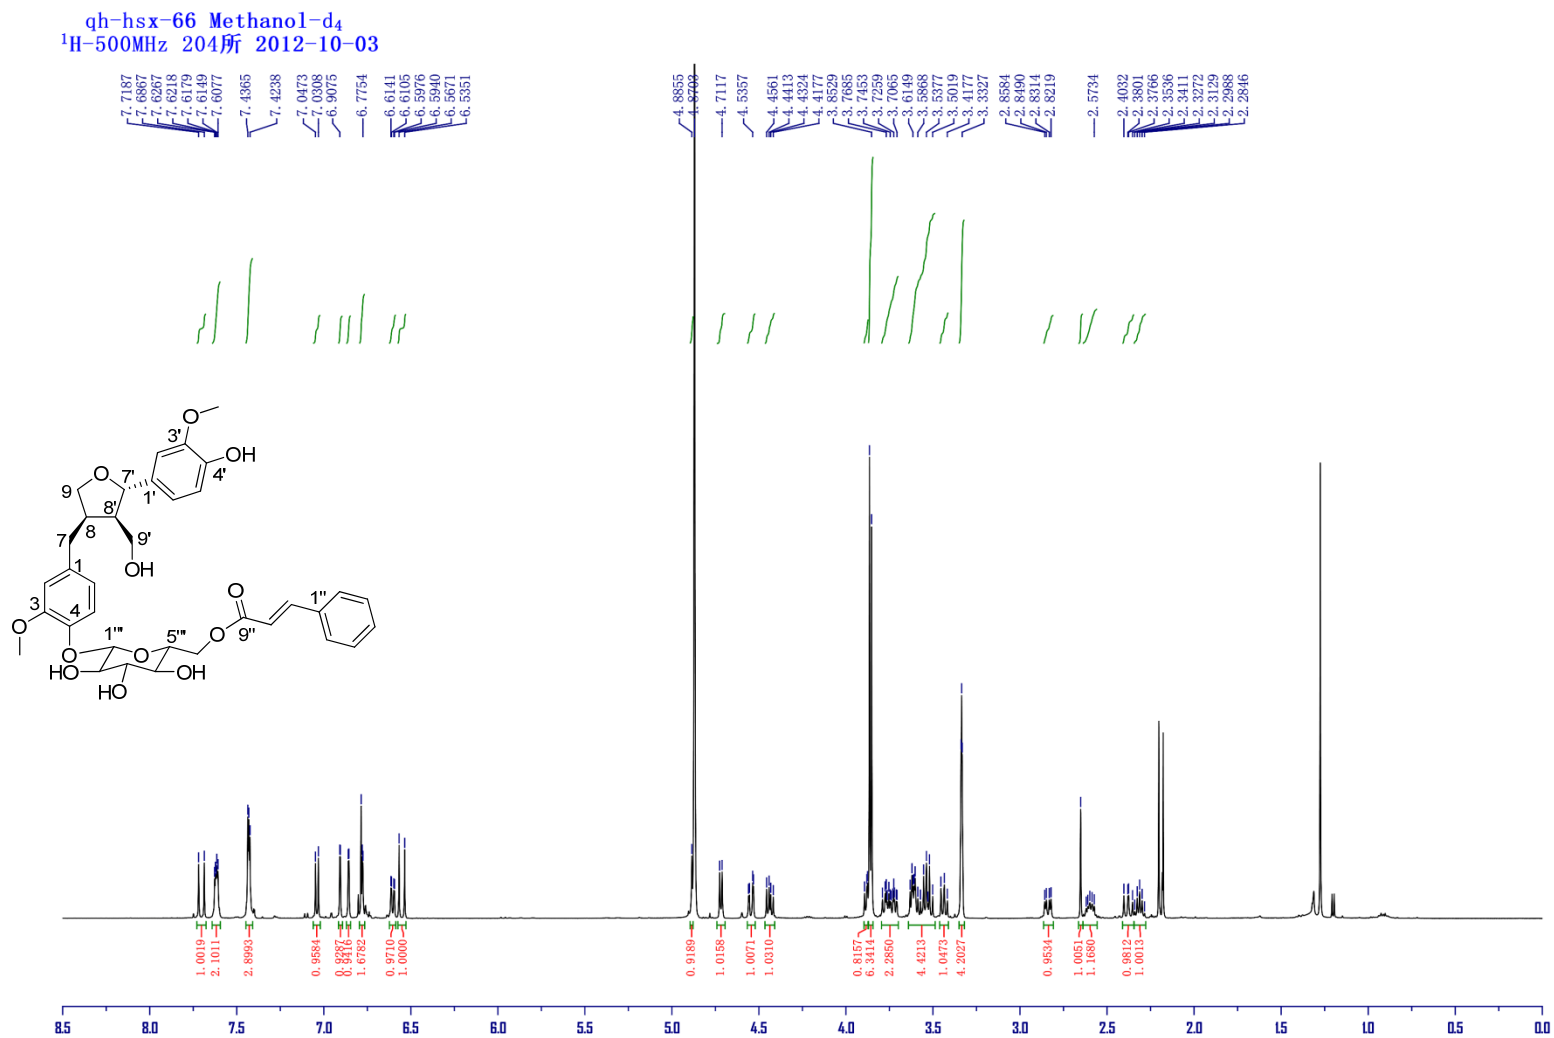

**Figure S16.** The  $^{13}\text{C}$ -NMR Spectrum of Compound **2** in  $\text{CD}_3\text{OD}$ .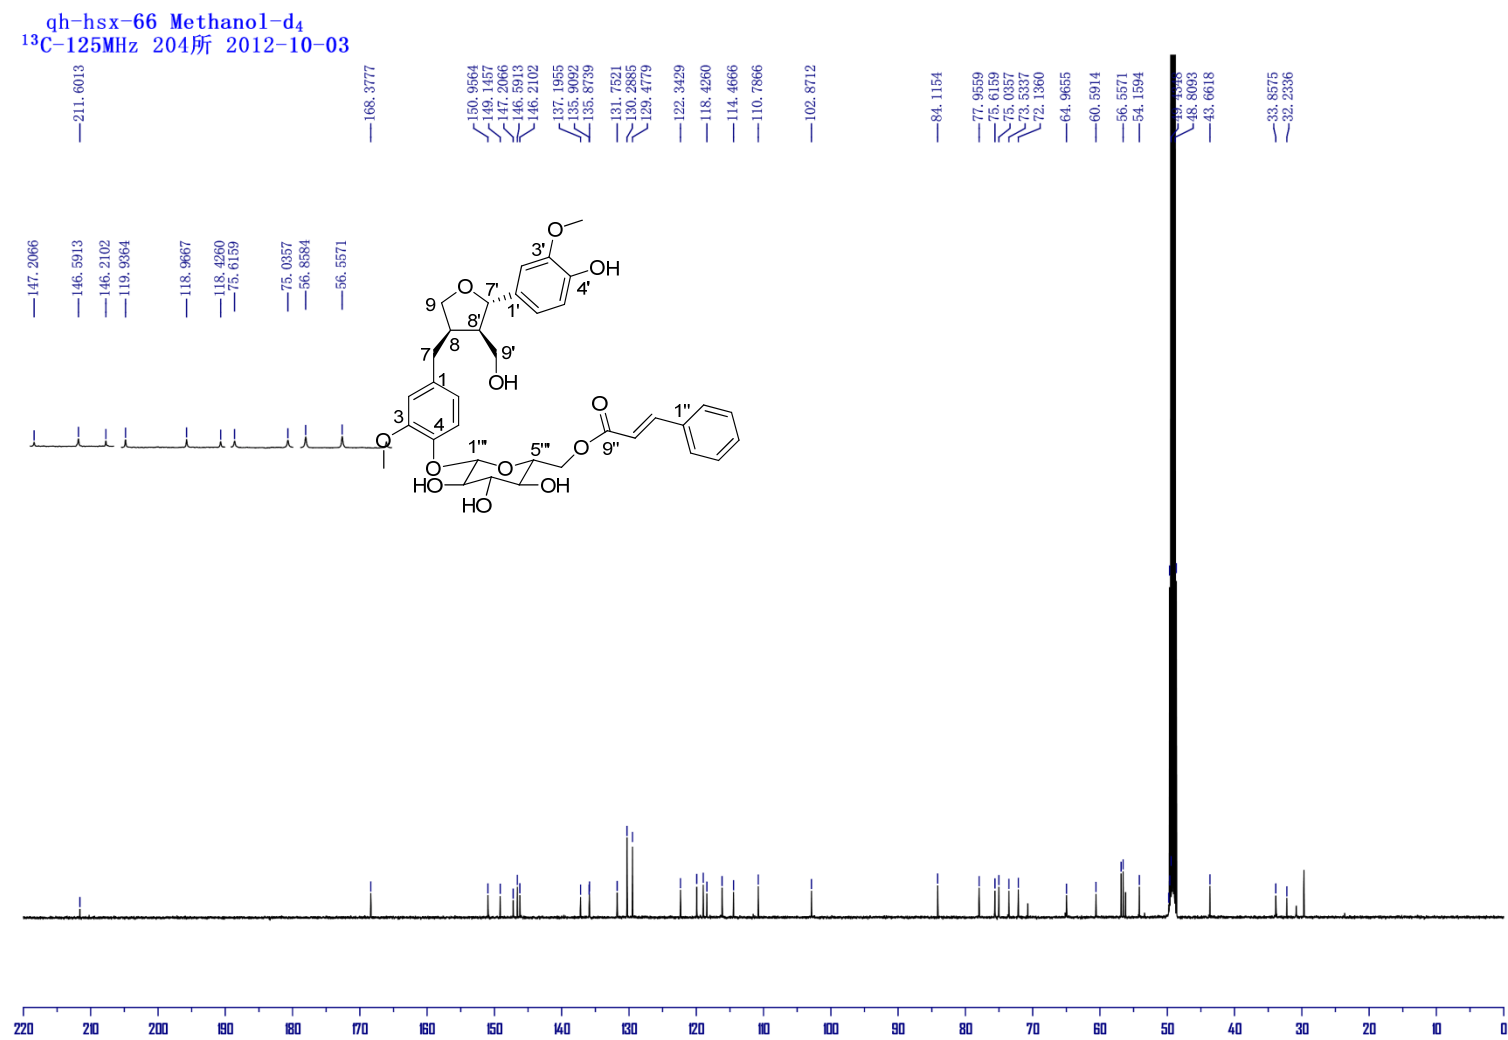

Figure S17. The DEPT Spectrum of Compound 2 in CD<sub>3</sub>OD.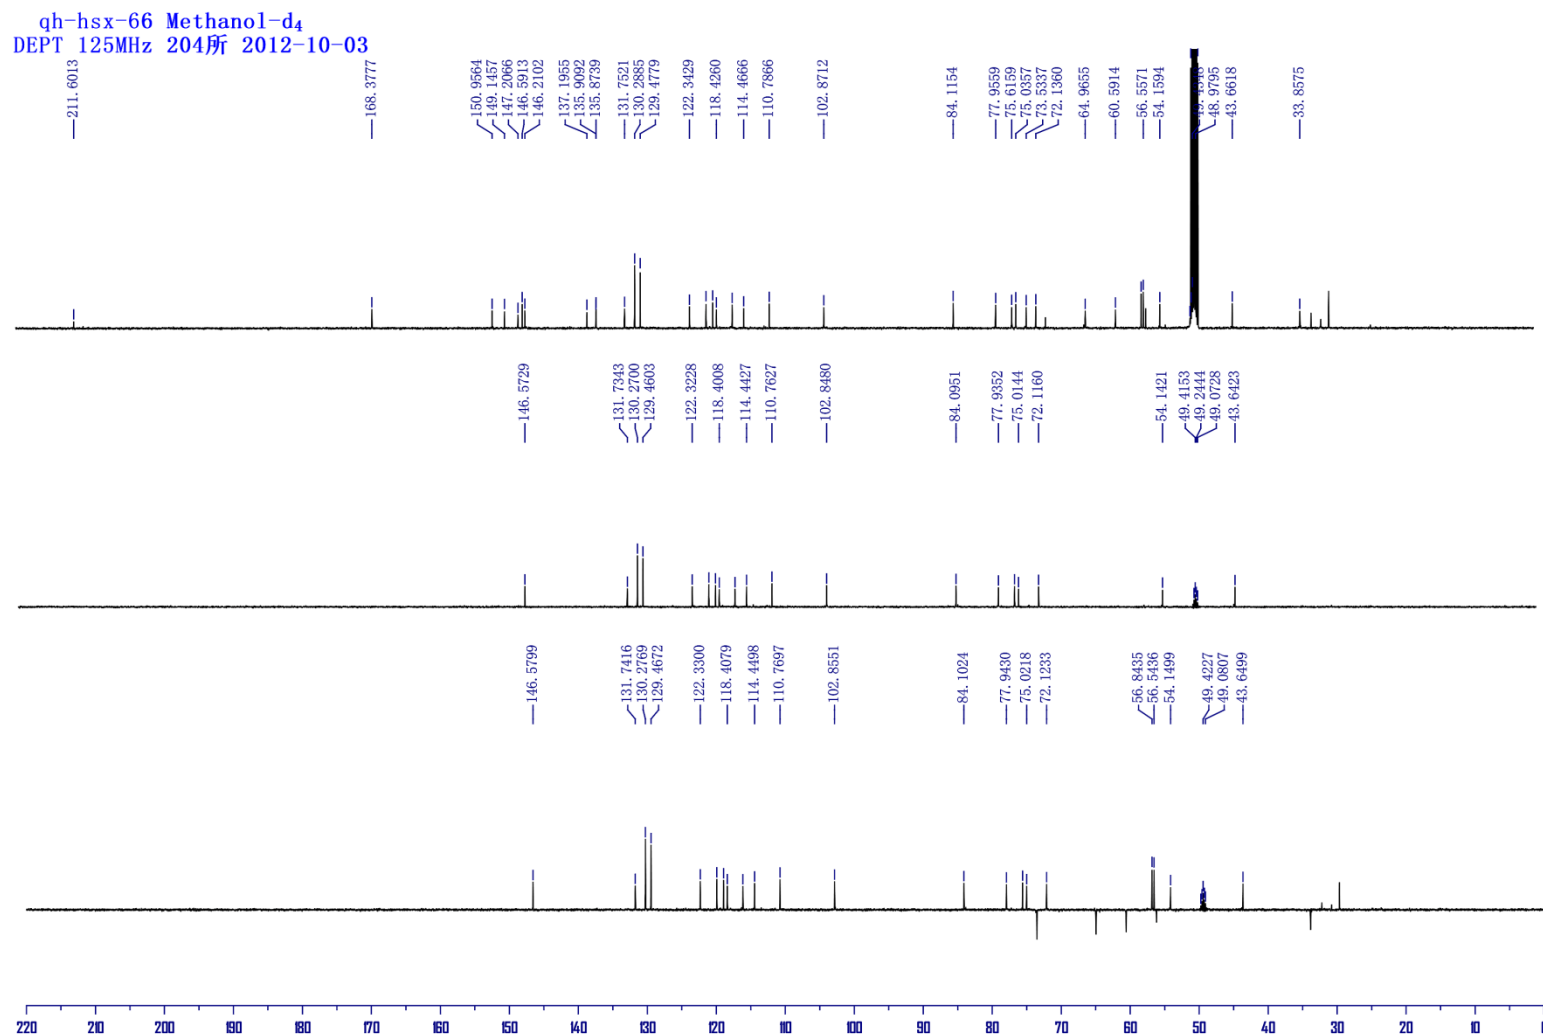



Figure S18. The HMQC Spectrum of Compound 2 in CD<sub>3</sub>OD.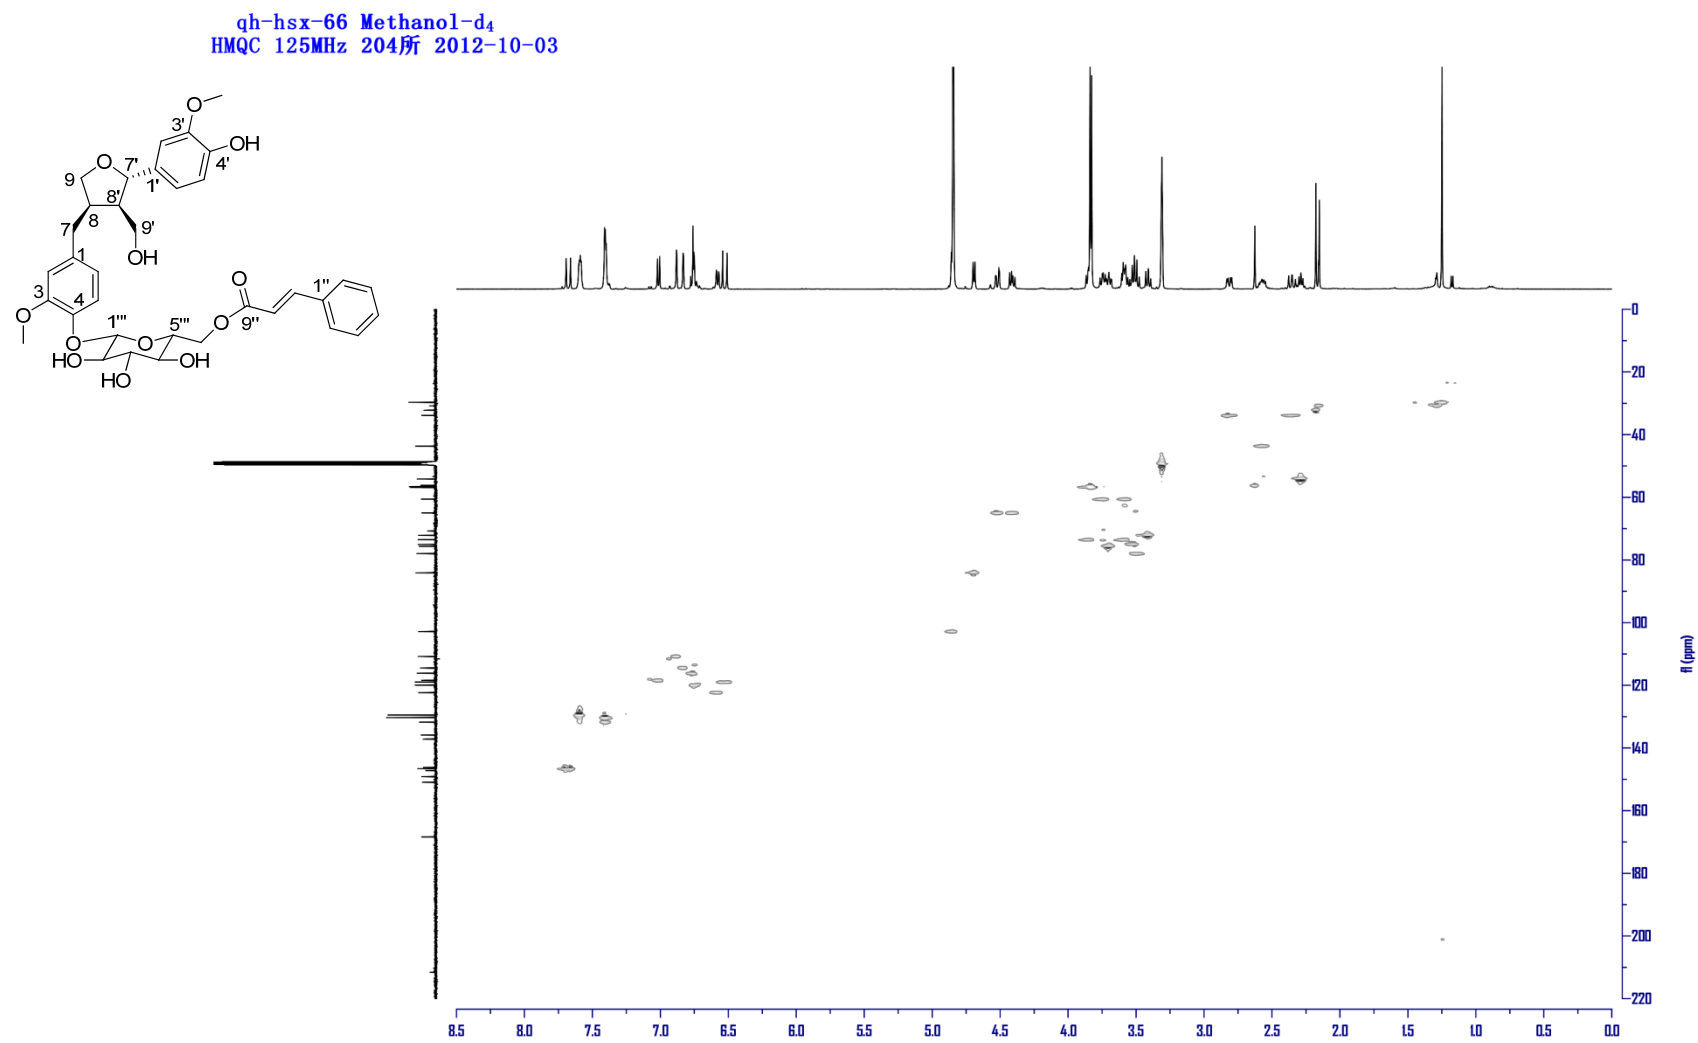

Figure S19. The HMBC Spectrum of Compound 2 in CD<sub>3</sub>OD.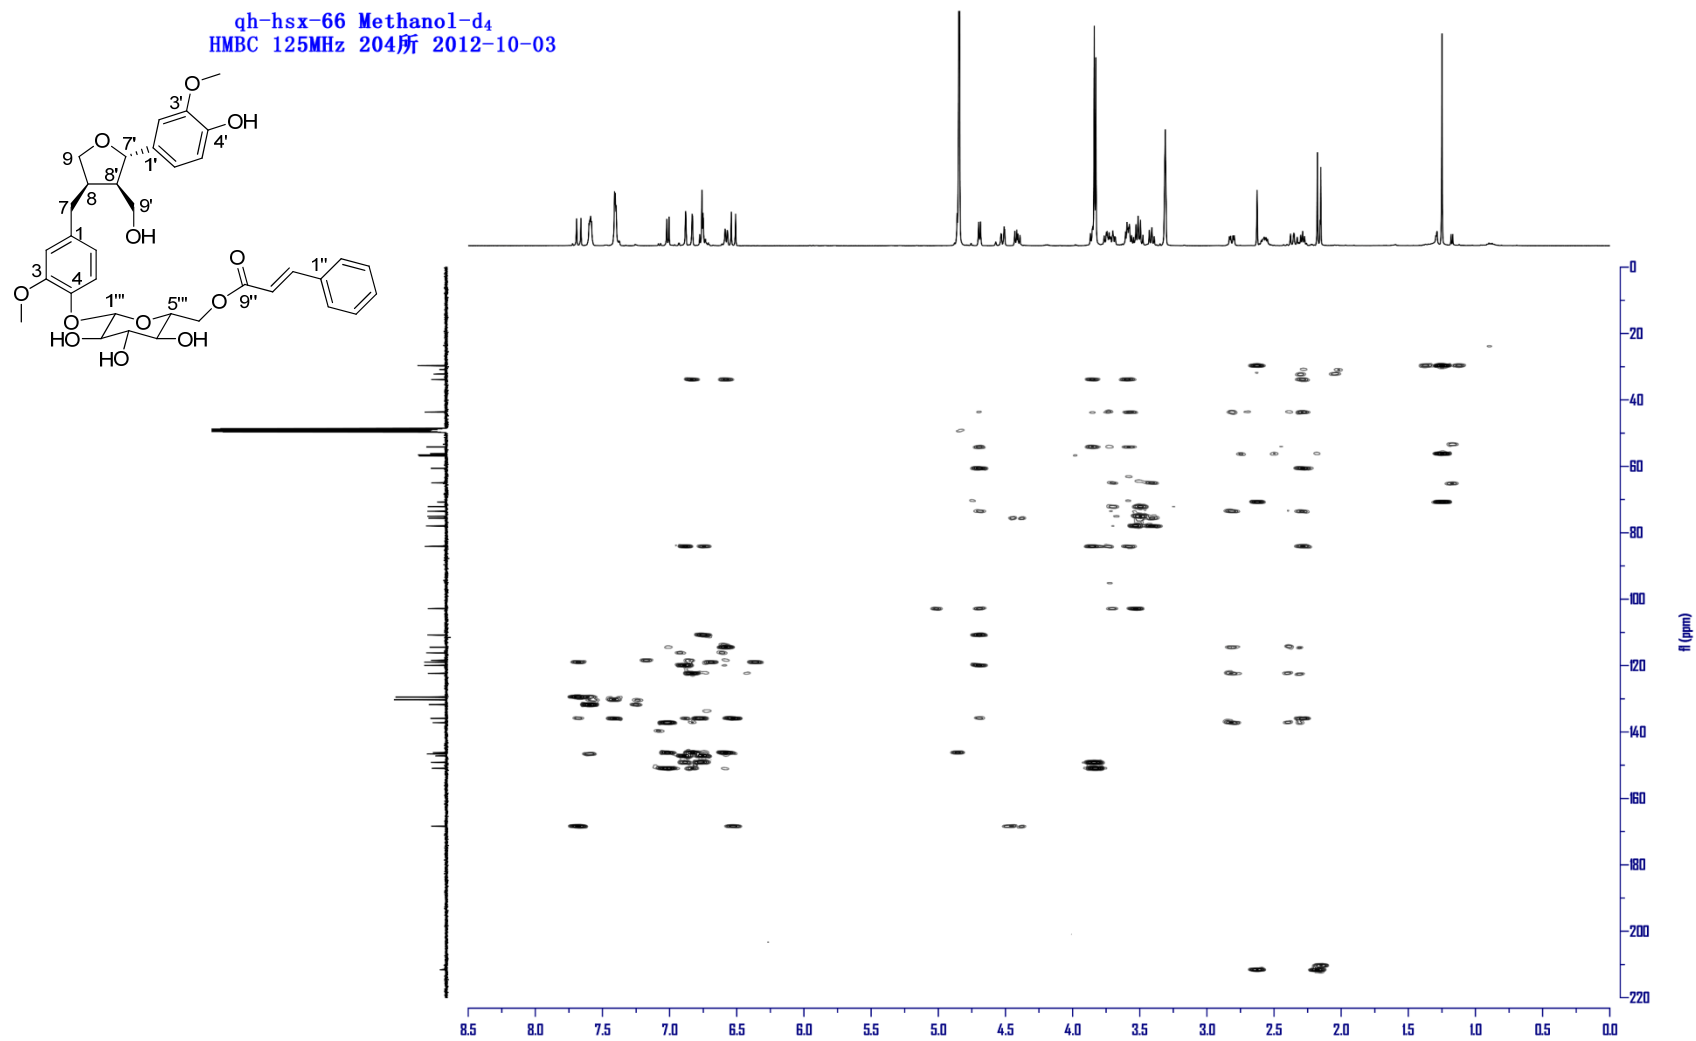

Figure S20. The NOESY Spectrum of Compound 2 in CD<sub>3</sub>OD.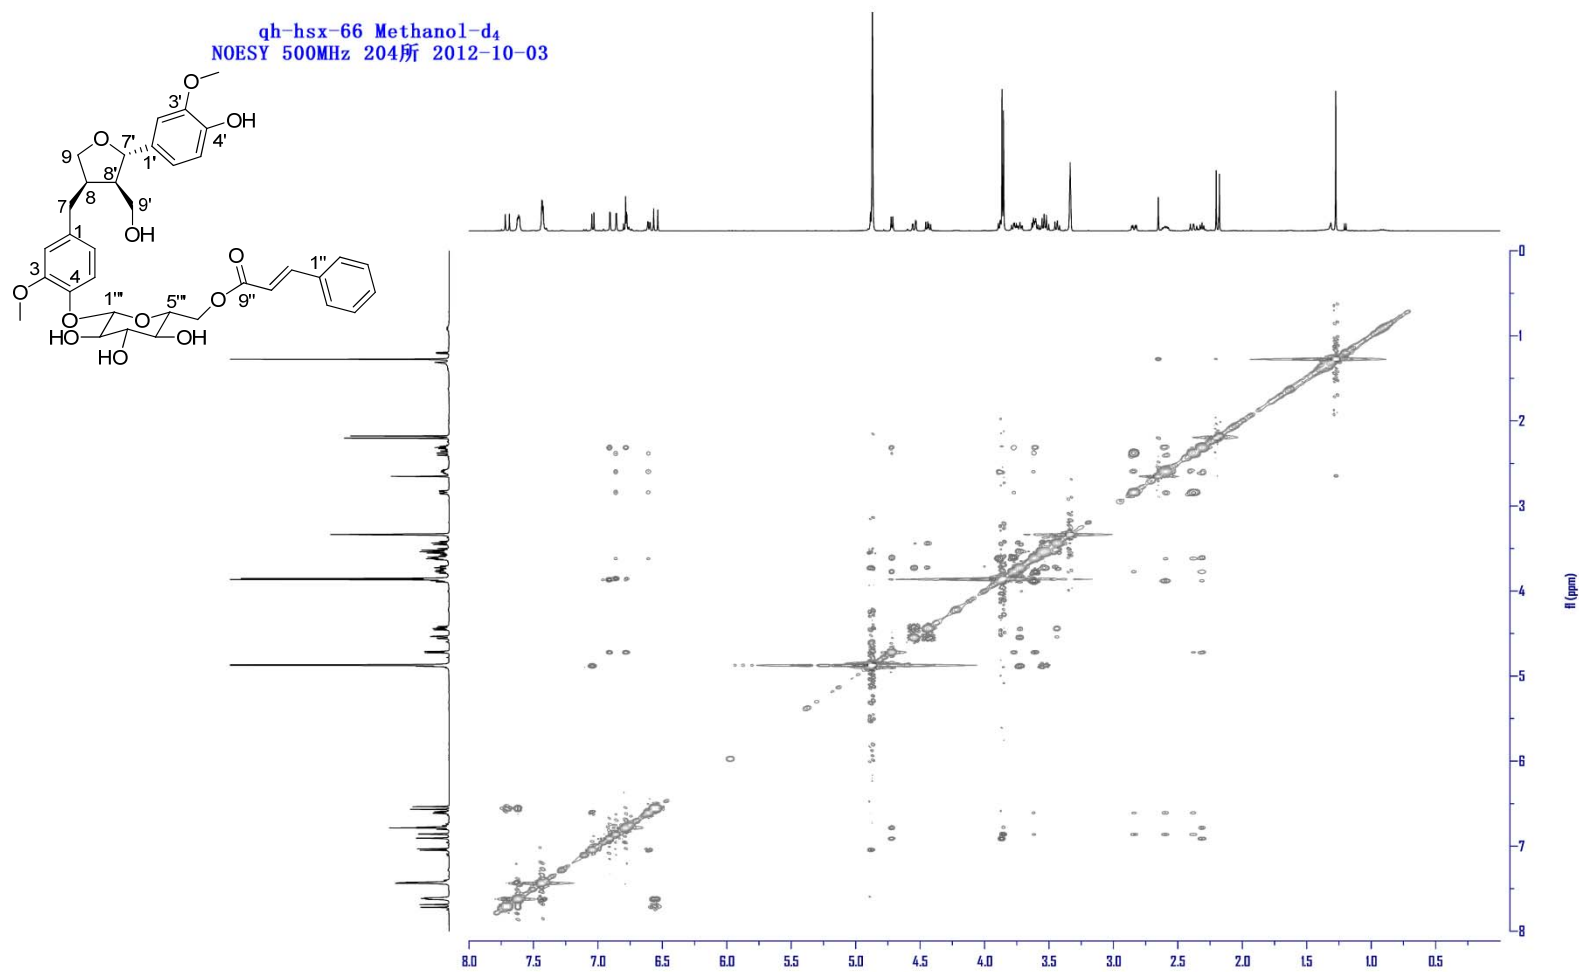

Figure S21. The NOESY Spectrum of Compound 2 in CD<sub>3</sub>OD.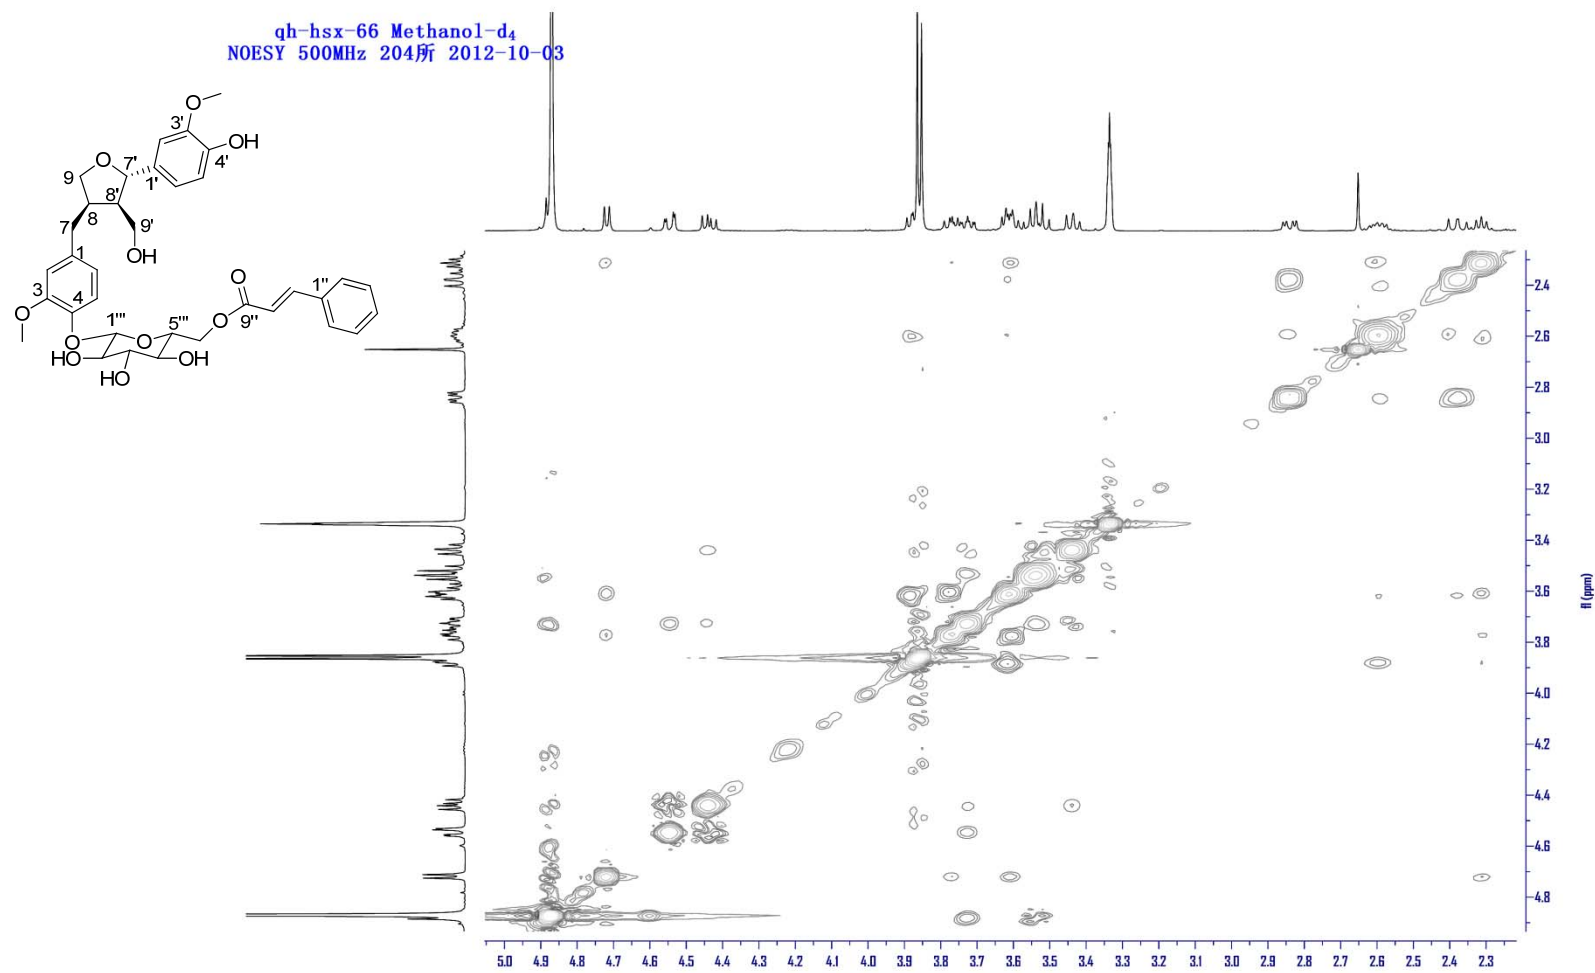

**Figure S22.** The UV Spectrum of Compound 3 in CH<sub>3</sub>OH.

Company:

Print Date: 2012-12-18 21:52:11

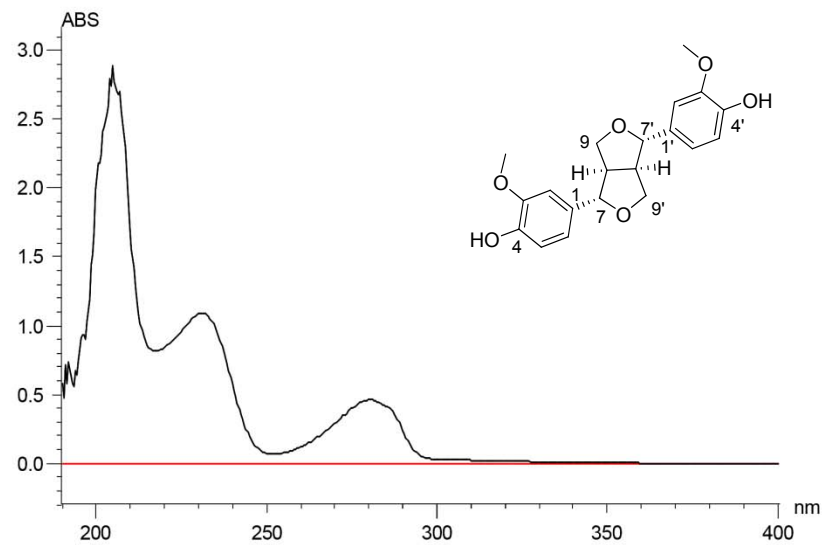

File Name: gh-hsx-19.wscn      Model: DB-20R  
Date: 2012-12-18 21:51:06      ROM Ver: 03  
Operator:      Manuf No: 6618005  
Name: Data 18  
Comment:

<<<< Instrument Parameters >>>>  
Measurement Type: WL Scan  
Data Mode: ABS  
Start WL: 400.0  
End WL: 190.0  
Scan Speed: 400 nm/min  
Sampling Interval: 0.5  
Slit Width: 1.0  
Lamp Change Mode: Auto  
Auto Change WL: 340.0  
Baseline: User 1  
Response: Fast  
Path Length: 10.0  
(ABS values are corrected to 10mm path length)

Figure S23. The IR Spectrum of Compound 3.

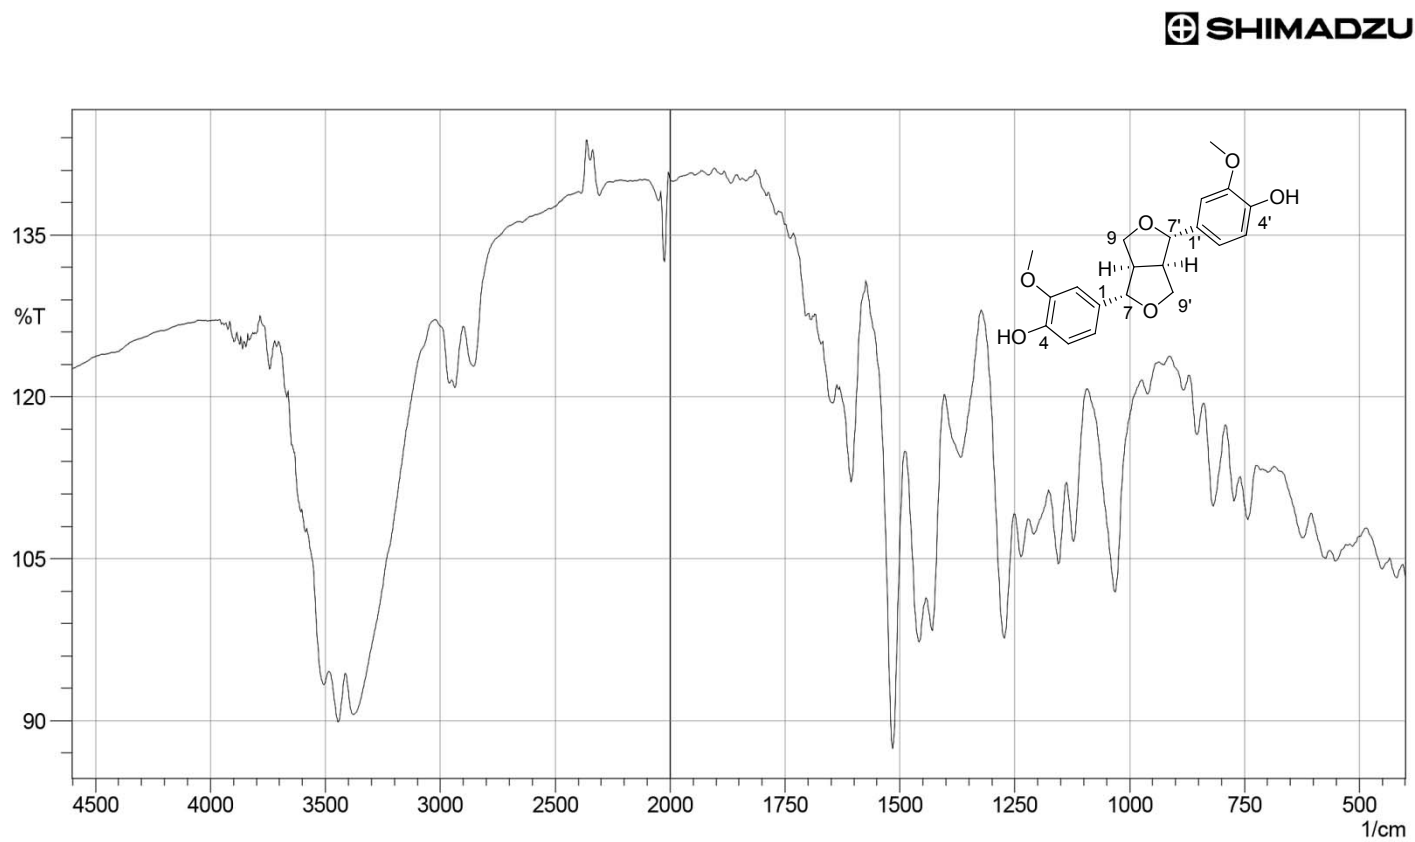

Figure S24. The MS Spectrum of Compound 3.

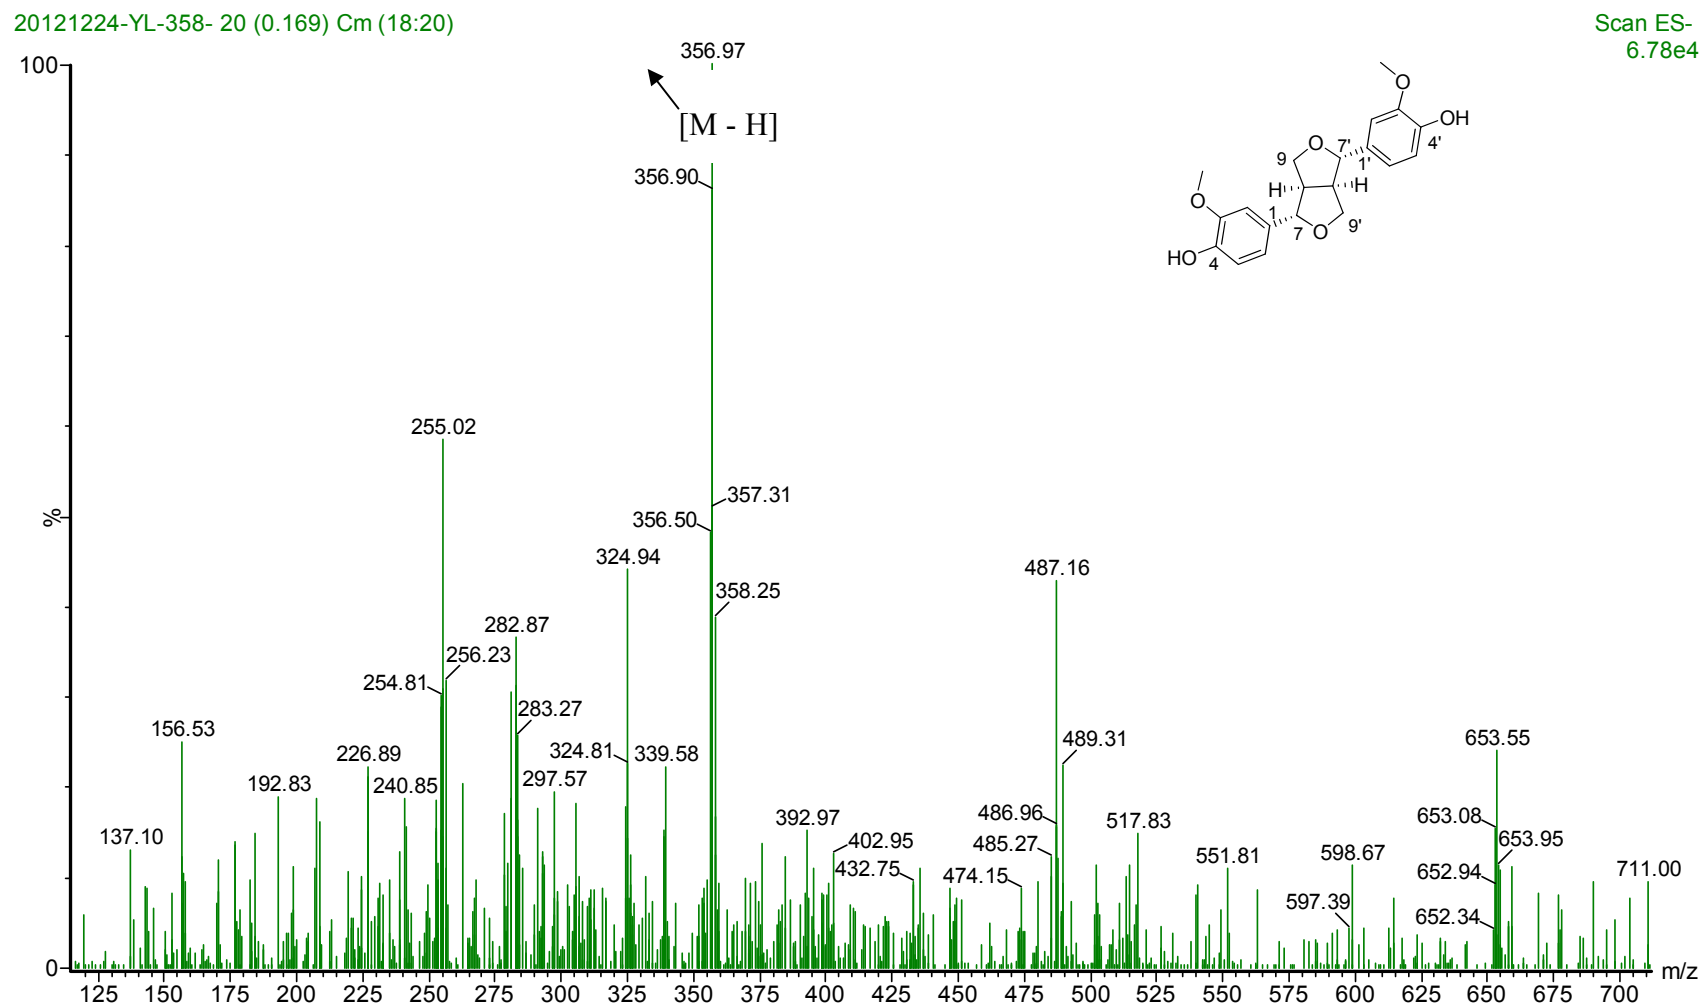

Figure S25. The  $^1\text{H}$ -NMR Spectrum of Compound 3 in  $\text{Me}_2\text{CO}-d_6$ .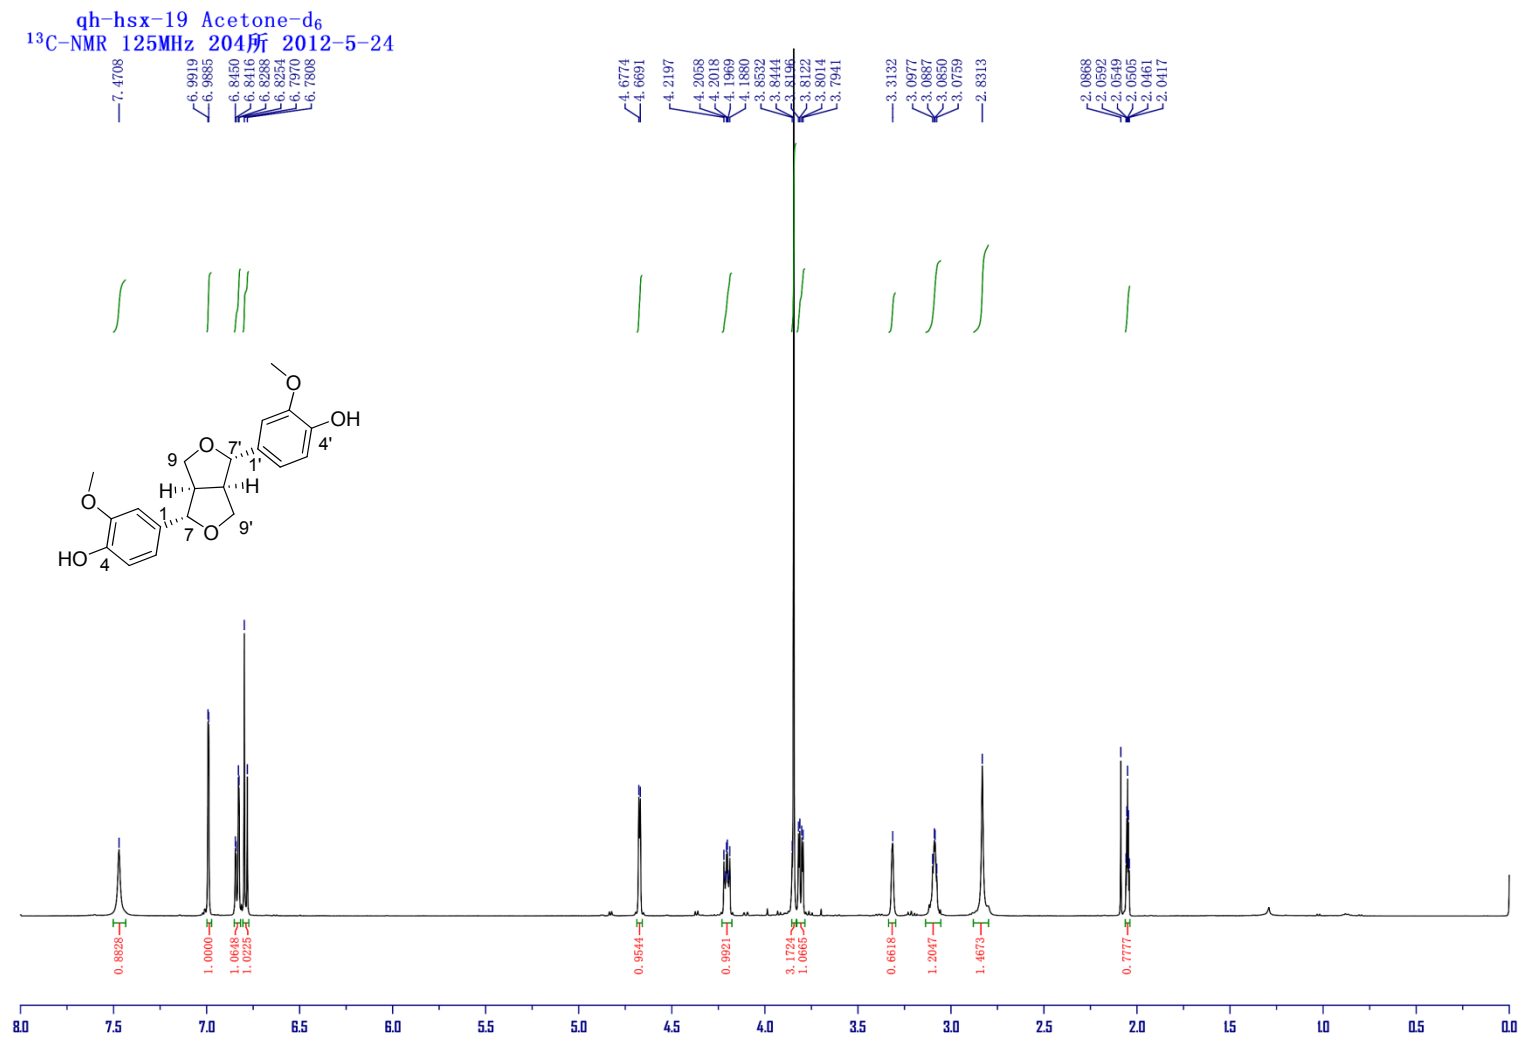



Figure S26. The  $^{13}\text{C}$ -NMR Spectrum of Compound 3 in  $\text{Me}_2\text{CO}-d_6$ .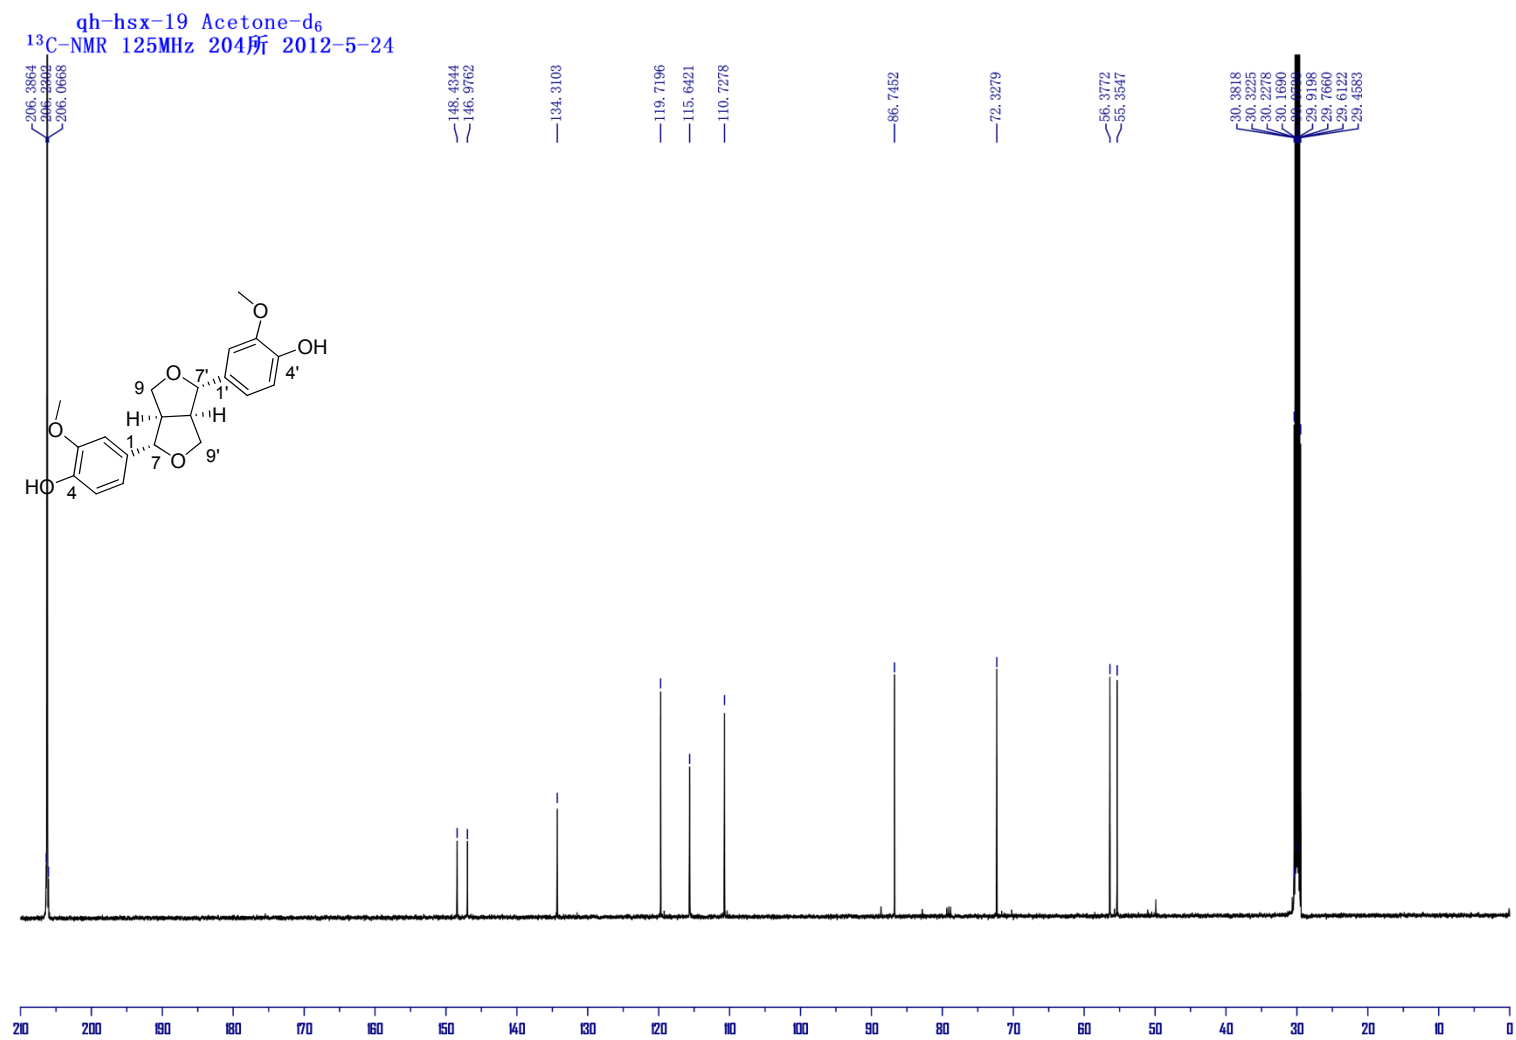

**Figure S27.** The UV Spectrum of Compound **4** in CH<sub>3</sub>OH.

Company:

Print Date: 2012-12-18 22:35:21

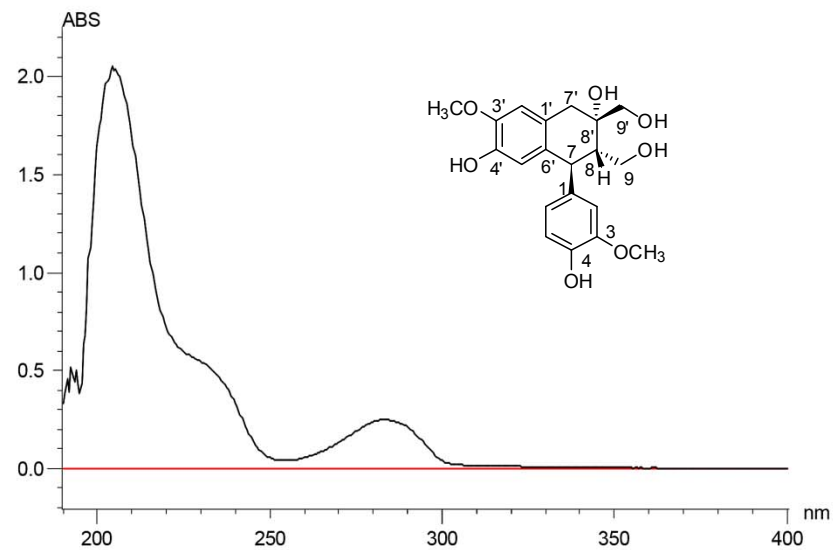

File Name: qh-hsx-39.wscn      Model: DB-20R  
 Date: 2012-12-18 22:32:35      ROM Ver: 03  
 Operator:                              Manuf No: 6618005  
 Name: Data 31  
 Comment:

<<<< Instrument Parameters >>>>  
 Measurement Type: WL Scan  
 Data Mode: ABS  
 Start WL: 400.0  
 End WL: 190.0  
 Scan Speed: 400 nm/min  
 Sampling Interval: 0.5  
 Slit Width: 1.0  
 Lamp Change Mode: Auto  
 Auto Change WL: 340.0  
 Baseline: User 1  
 Response: Fast  
 Path Length: 10.0  
 (ABS values are corrected to 10mm path length)

Figure S28. The IR Spectrum of Compound 4.

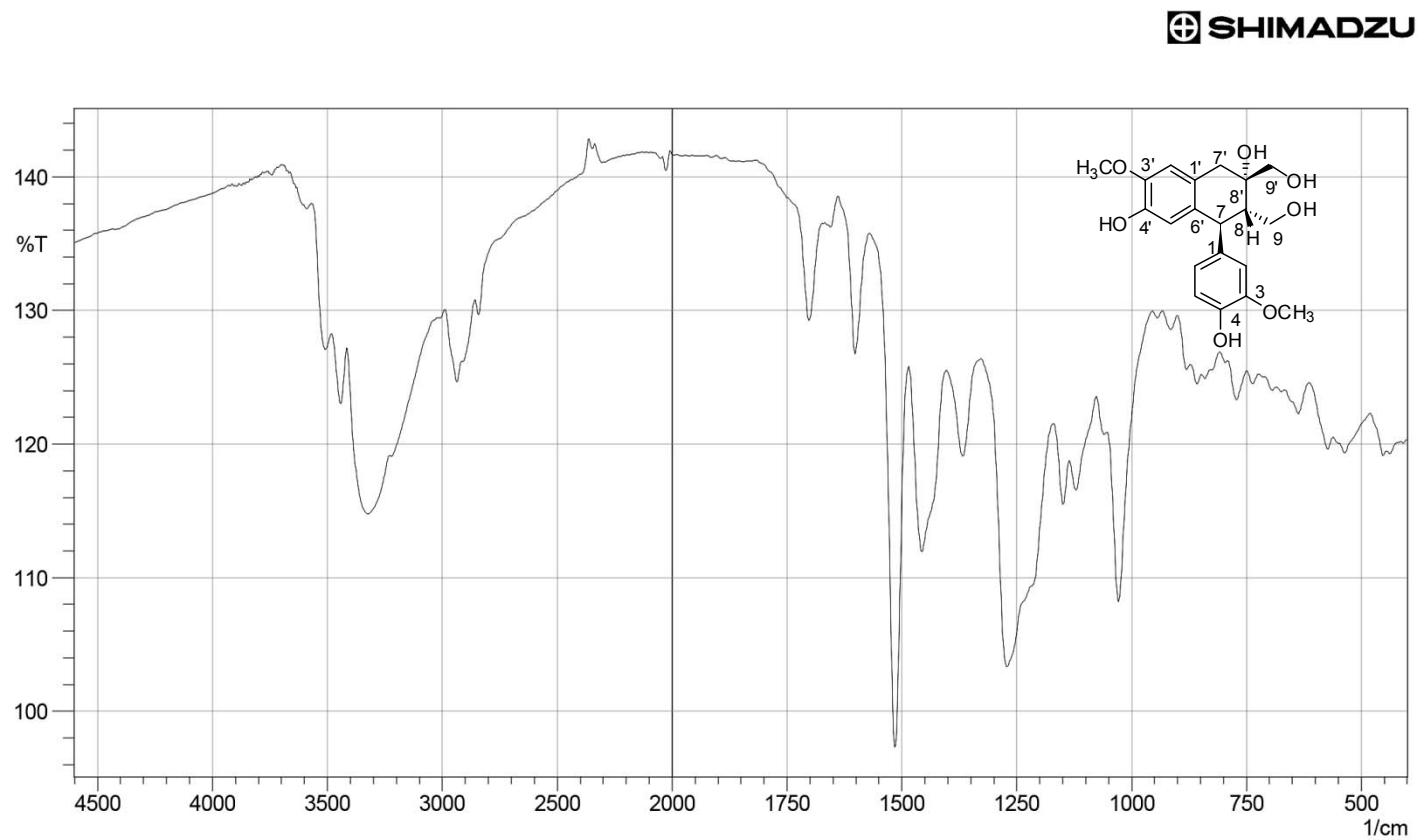

Figure S29. The MS Spectrum of Compound 4.

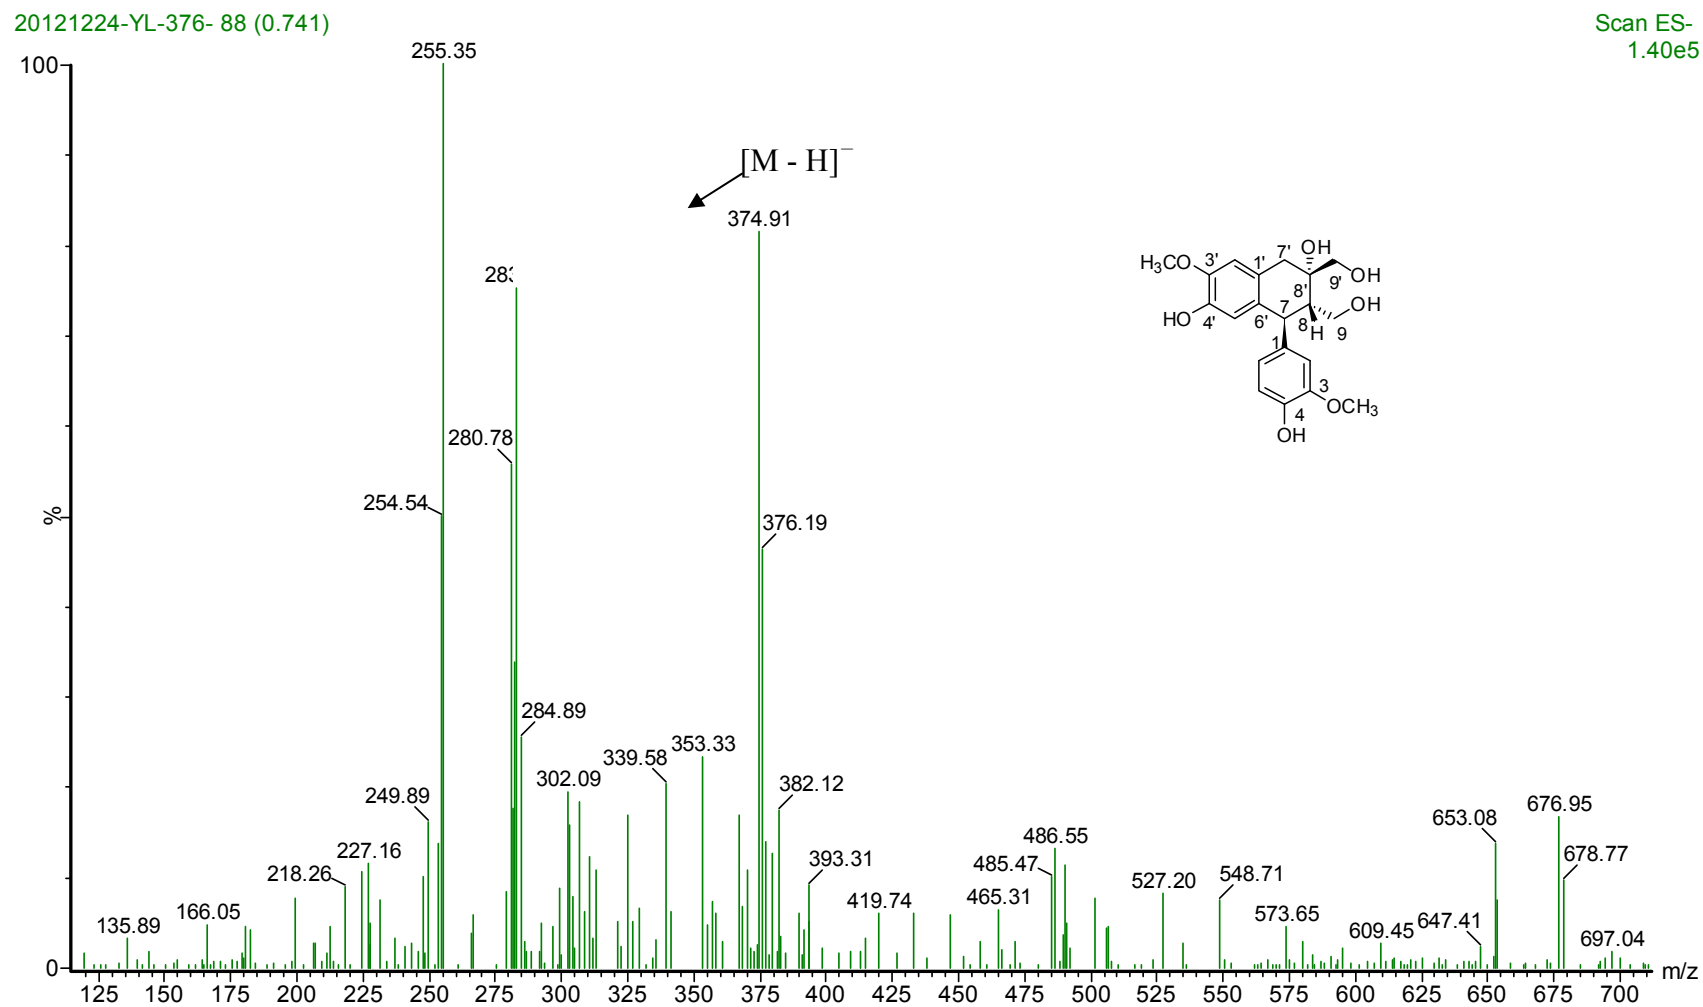

Figure S30. The  $^1\text{H-NMR}$  Spectrum of Compound 4 in  $\text{CD}_3\text{OD}$ .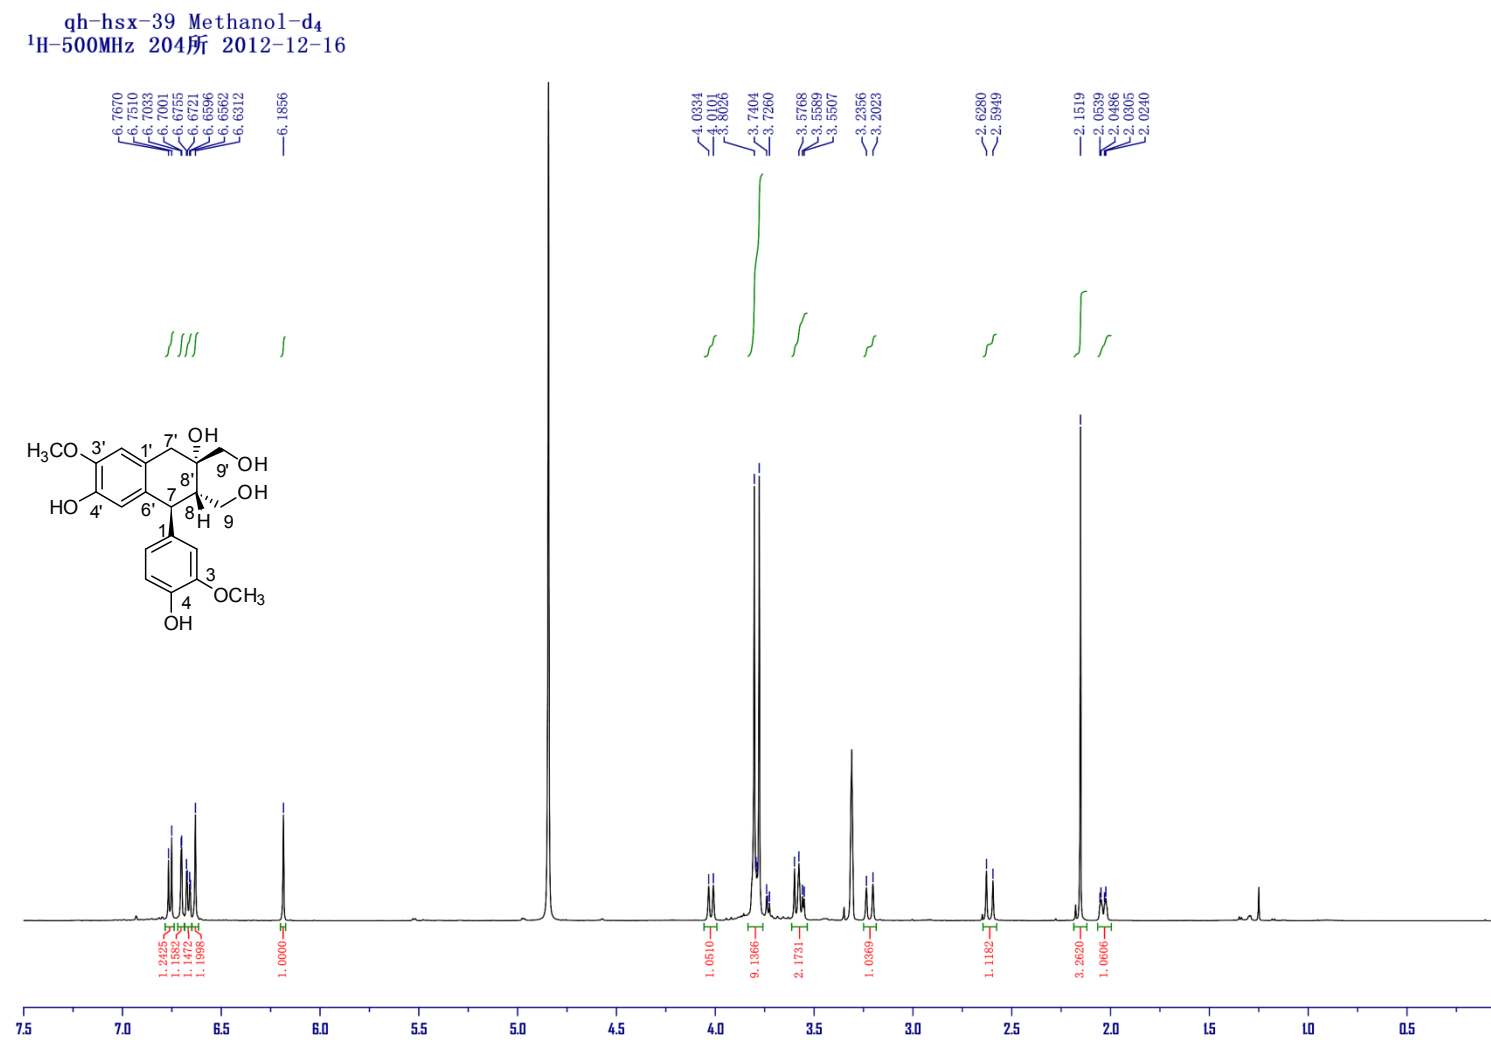

**Figure S31.** The  $^{13}\text{C}$ -NMR Spectrum of Compound **4** in  $\text{CD}_3\text{OD}$ .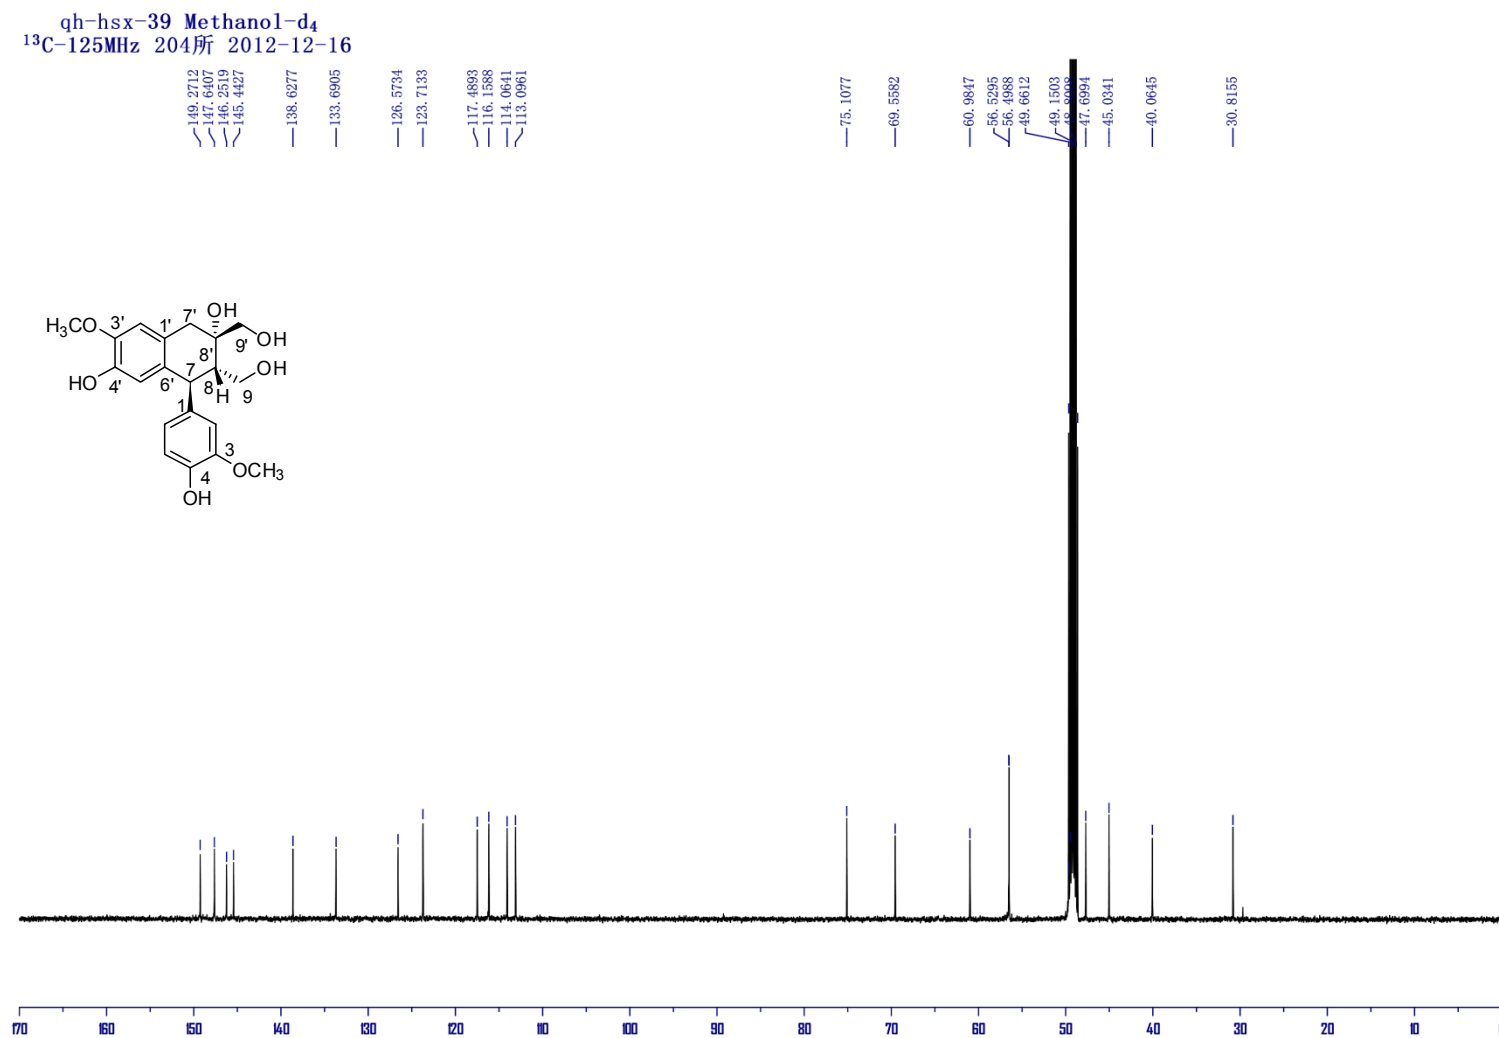

Figure S32. The DEPT Spectrum of Compound 4 in CD<sub>3</sub>OD.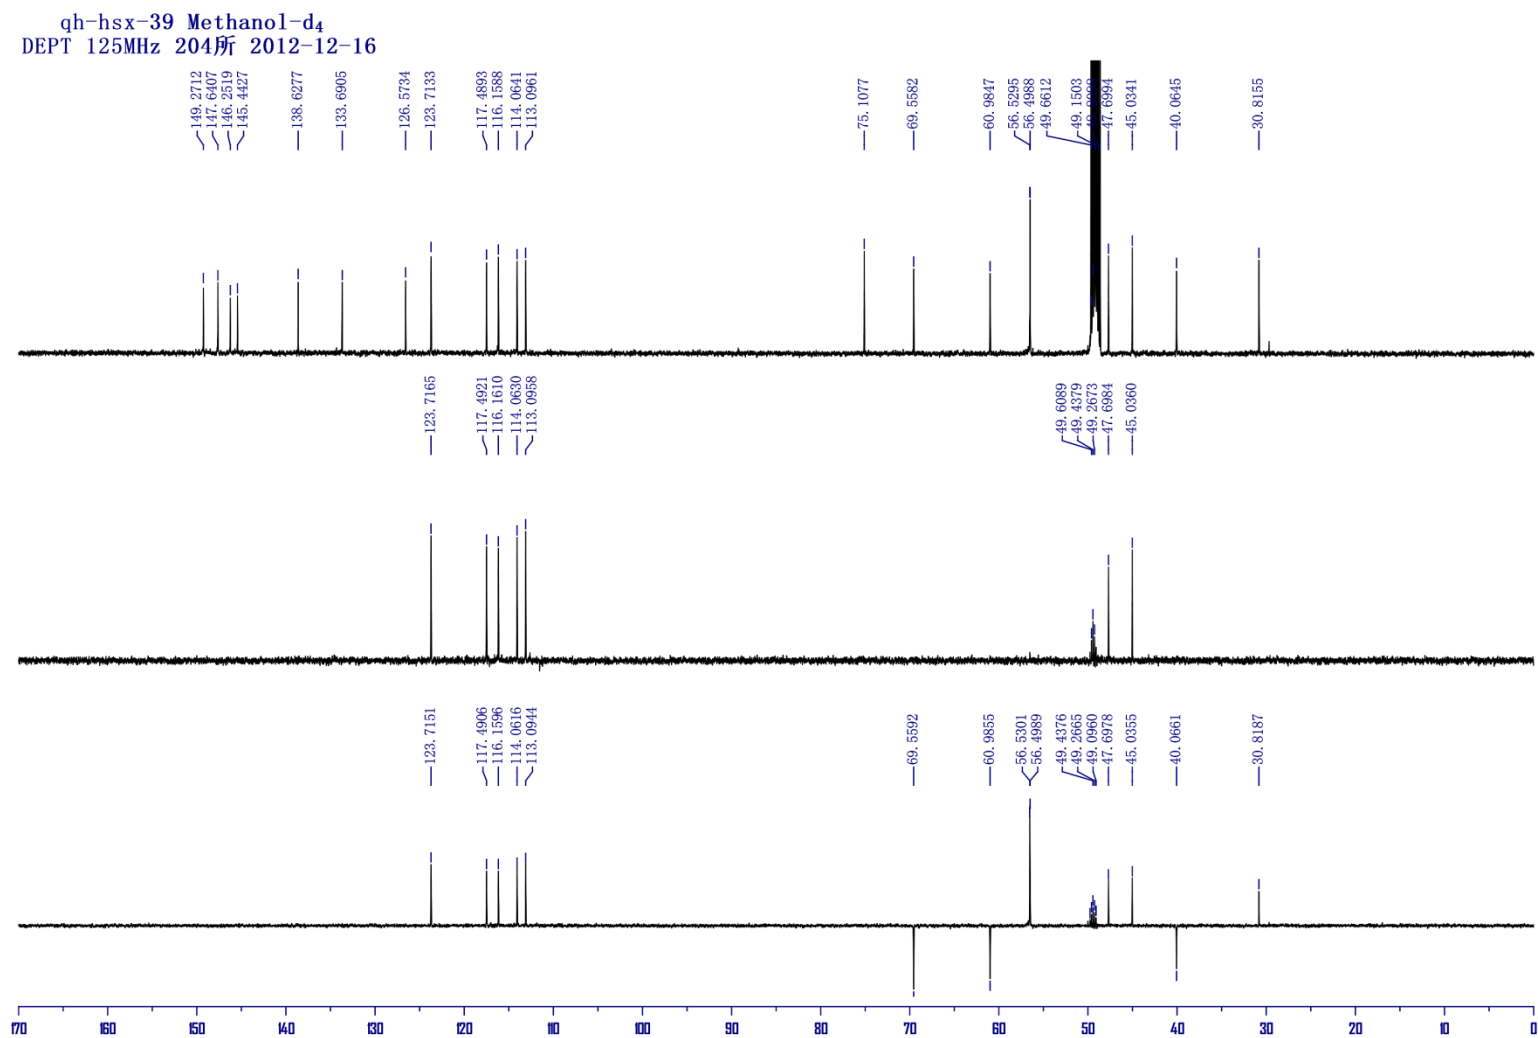

**Figure S33.** The UV Spectrum of Compound **5** in CH<sub>3</sub>OH.

Company:

Print Date: 2012-12-18 23:45:56

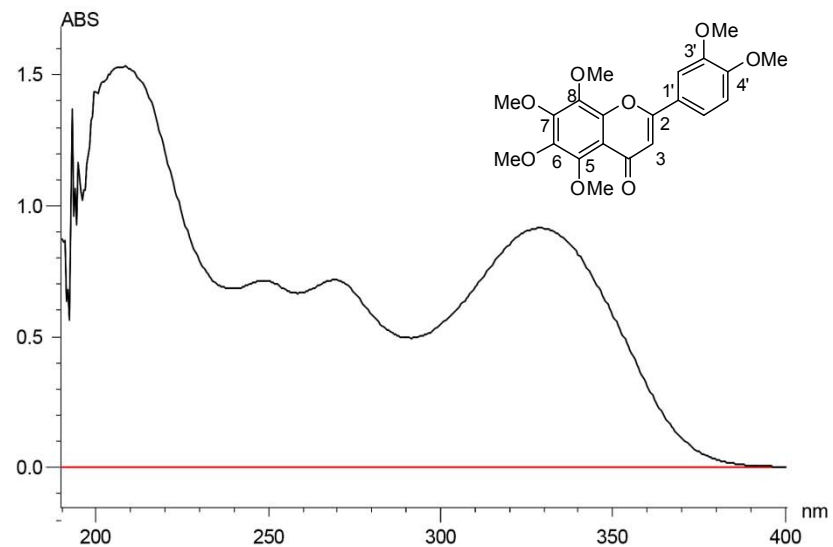

File Name: qh-hsx-75.wscn                    Model:        DB-20R  
Date:        2012-12-18 23:45:11            ROM Ver:     03  
Operator:                                    Manuf No:    6618005  
Name:        Data 57  
Comment:

<<<< Instrument Parameters >>>>  
Measurement Type: WL Scan  
Data Mode:        ABS  
Start WL:         400.0  
End WL:          190.0  
Scan Speed:      400 nm/min  
Sampling Interval: 0.5  
Slit Width:      1.0  
Lamp Change Mode: Auto  
Auto Change WL: 340.0  
Baseline:        User 1  
Response:        Fast  
Path Length:    10.0  
(ABS values are corrected to 10mm path length)



Figure S34. The IR Spectrum of Compound 5.

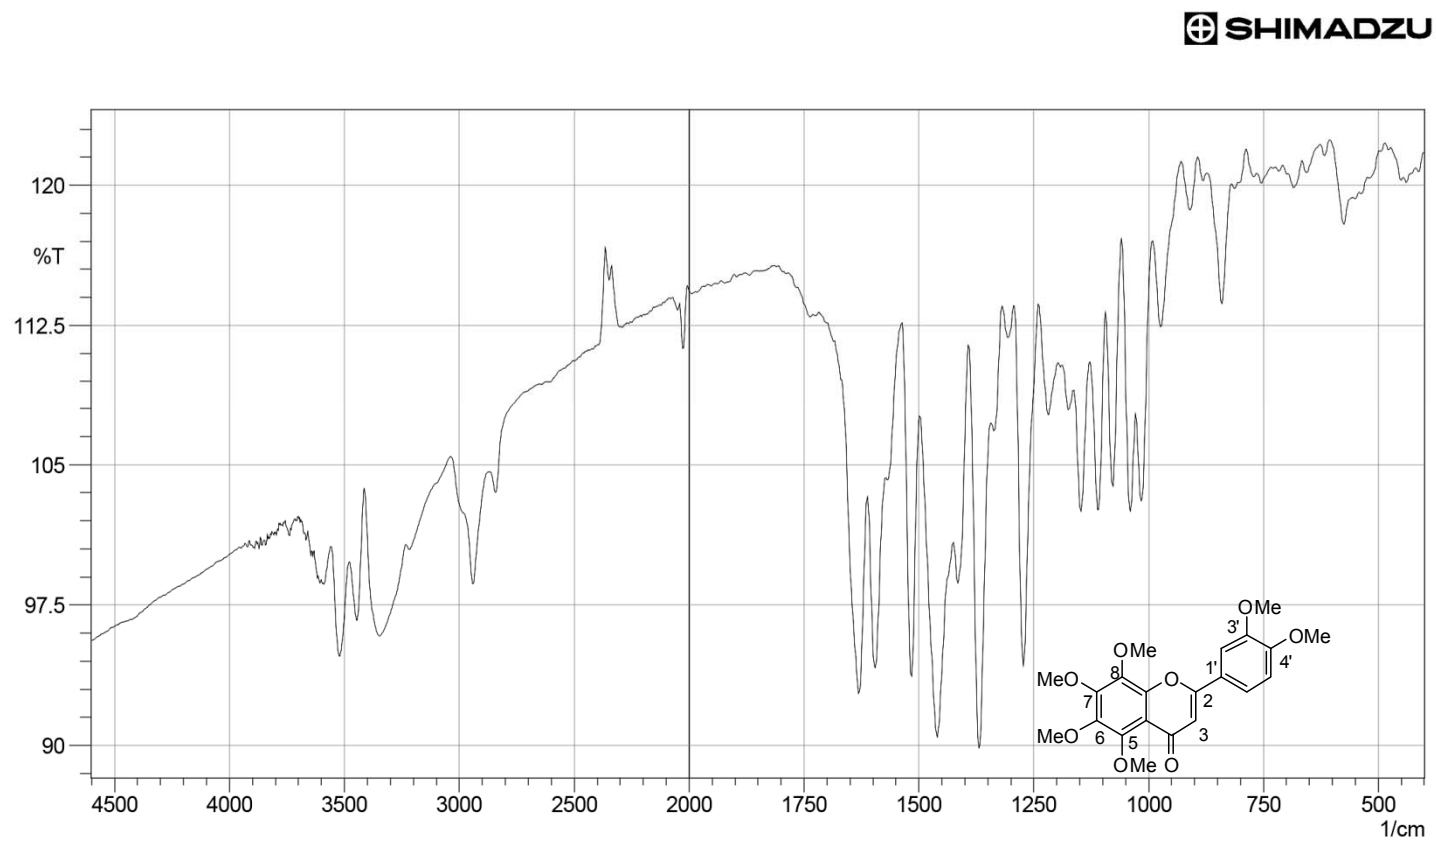

Figure S35. The ESIMS Spectrum of Compound 5.

20121224-YL-402 25 (0.211) Cm (25:28)

Scan ES+  
9.78e7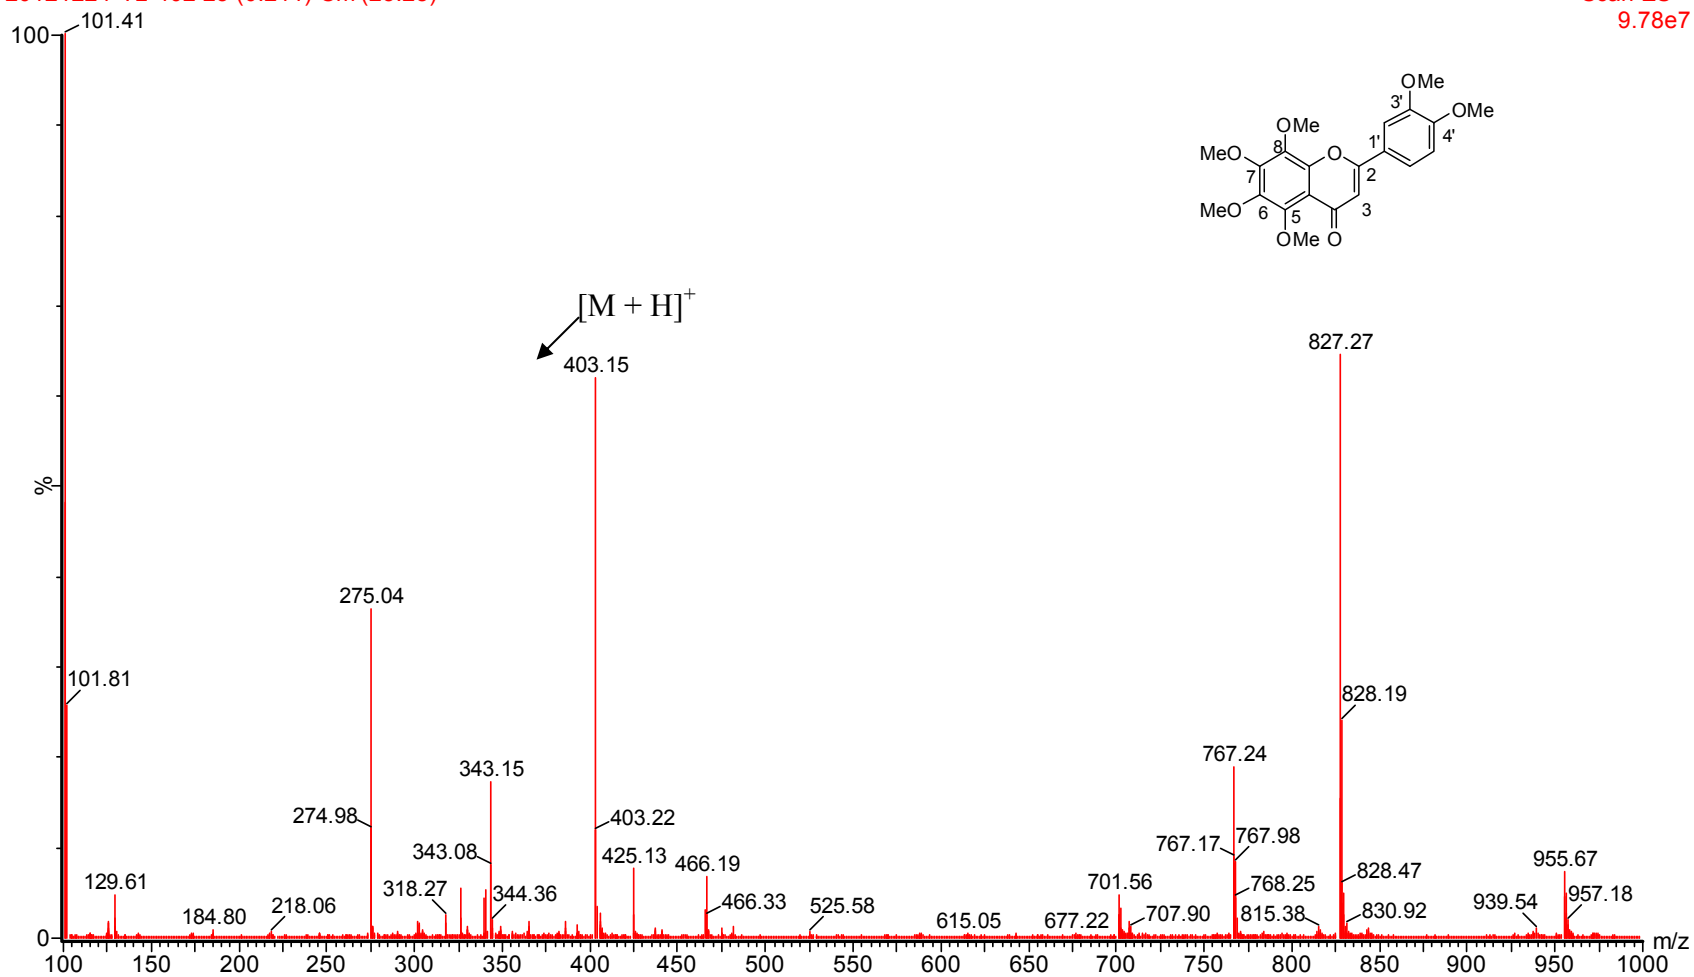

Figure S36. The  $^1\text{H-NMR}$  Spectrum of Compound **5** in  $\text{Me}_2\text{CO}-d_6$ .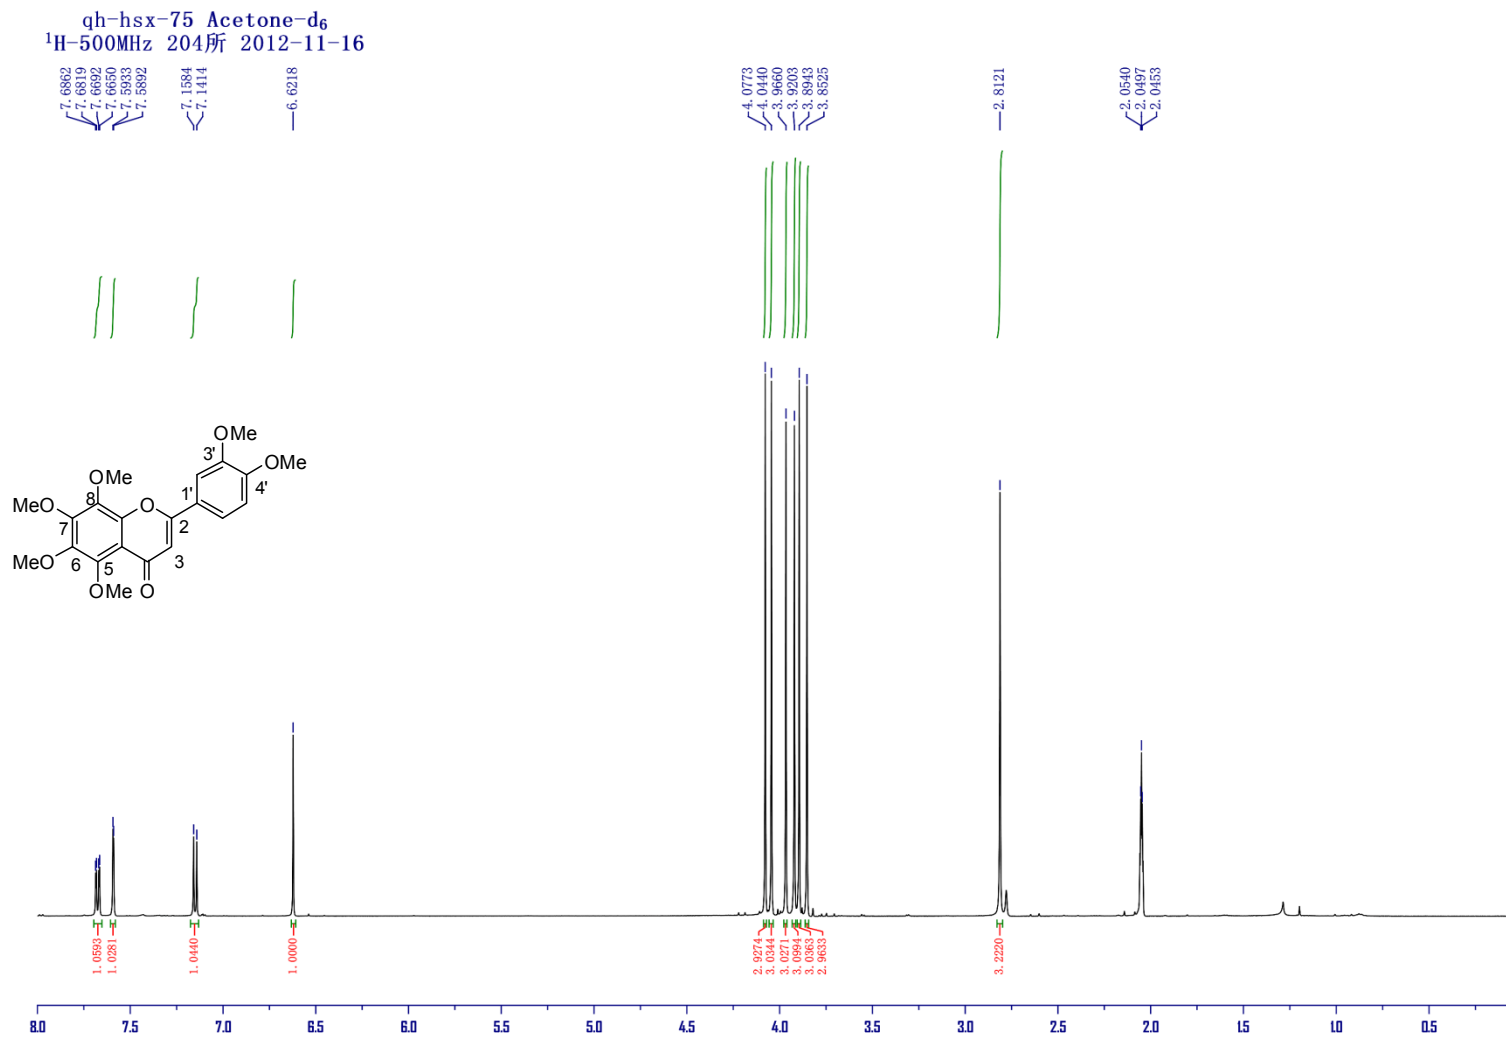

Figure S37. The  $^{13}\text{C}$ -NMR Spectrum of Compound 5 in  $\text{Me}_2\text{CO}-d_6$ .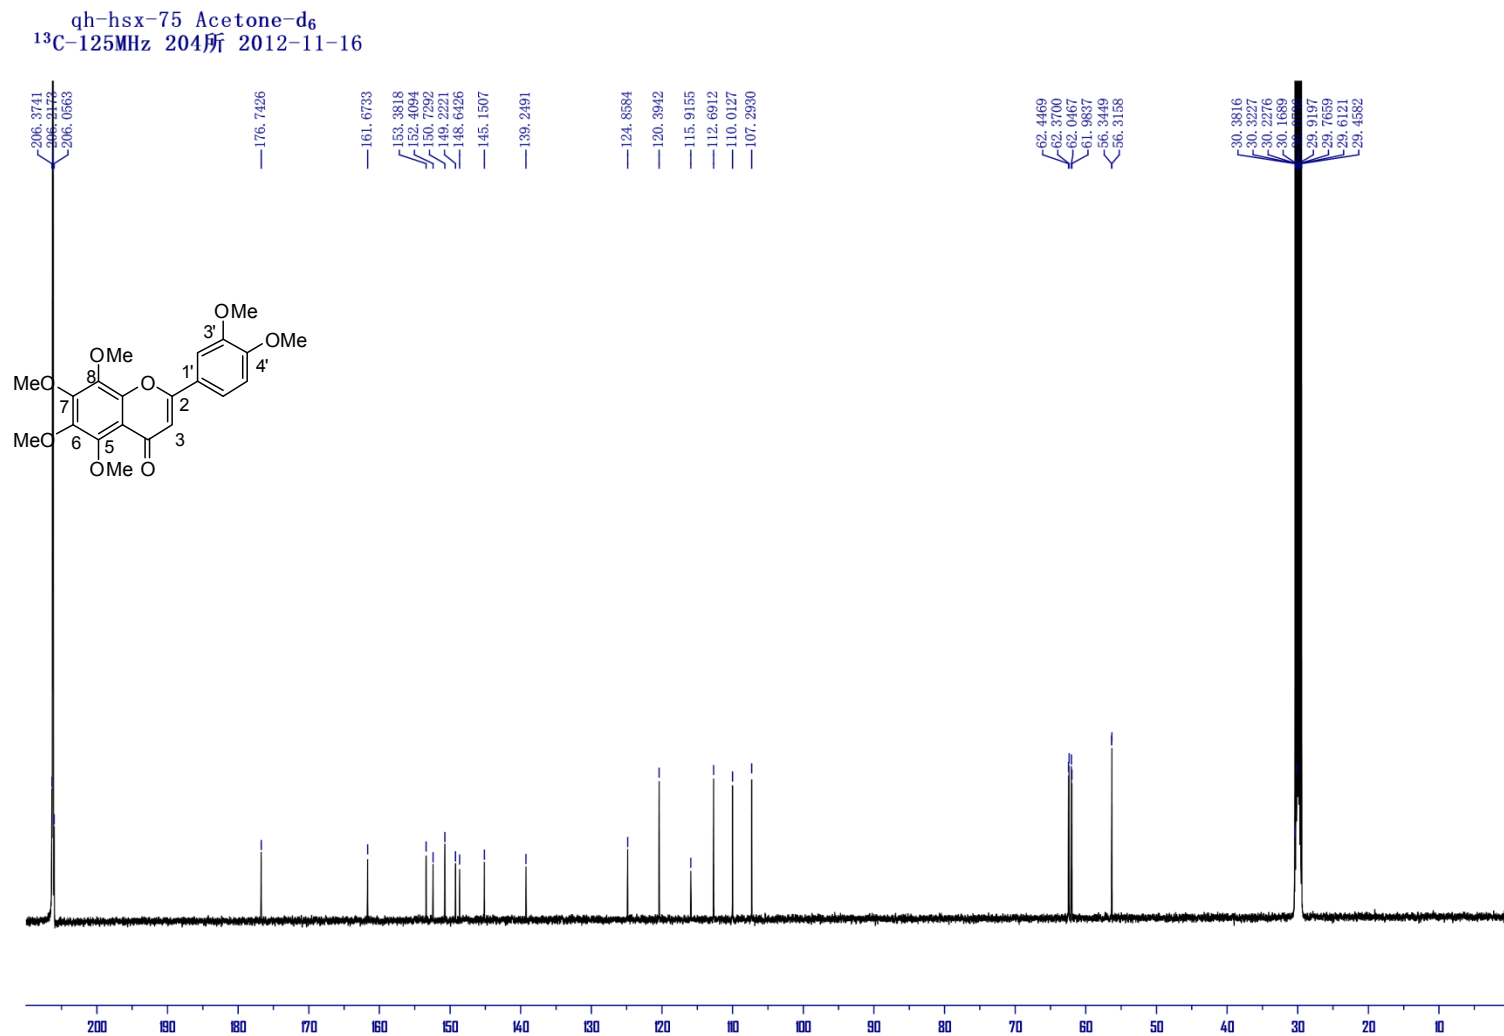

Figure S38. The DEPT Spectrum of Compound 5 in Me<sub>2</sub>CO-d<sub>6</sub>.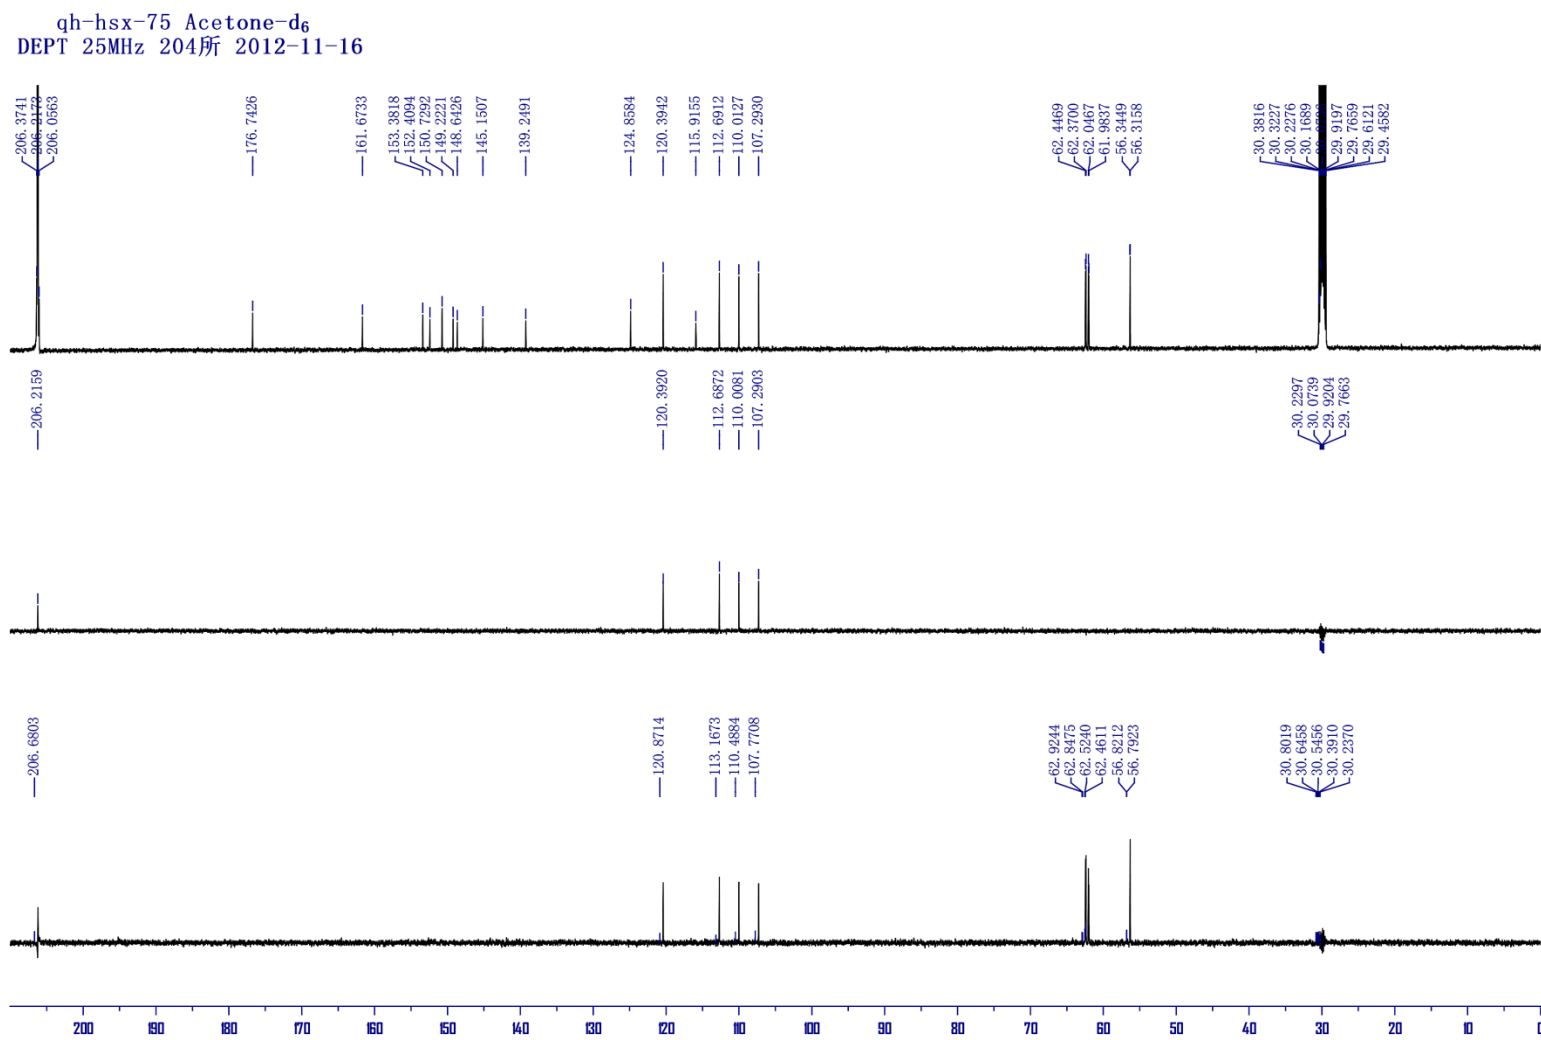

Supplement: molecules-18-04766-s001.pdf [file molecules-18-04766-s001.pdf]
